## 31 INTRODUCTION

32 Vimentin is an intermediate filament (IF) protein which assembles into extensive cytoskeletal  
33 networks mainly in cells of mesenchymal origin <sup>1,2</sup>. Vimentin IFs (VIFs) participate in a broad  
34 range of cellular processes, such as the development of focal adhesions <sup>3</sup>, the protrusion of  
35 lamellipodia <sup>4</sup>, the assembly of stress-fibres <sup>5</sup>, the elongation of invadopodia <sup>6</sup>, the regulation  
36 of the dynamic properties of microtubules <sup>7,8</sup>, and even virus infection <sup>9,10</sup>. Vimentin expression  
37 and the assembly of VIFs are canonical markers and regulators of the epithelial-mesenchymal  
38 transition <sup>11</sup> and are involved in many aspects of cancer initiation and progression <sup>12,13</sup>, and  
39 other pathophysiological conditions <sup>14-17</sup>.

40 More specifically, VIFs are essential components of cellular architecture with respect to the  
41 establishment and maintenance of the shape and mechanical integrity of cells <sup>18-20</sup>.  
42 Furthermore, VIFs form highly dynamic cytoplasmic meshworks that extend throughout the cell  
43 and which can rapidly respond to changes in the cellular environment. This fast and versatile  
44 remodelling of the VIFs comprising these meshworks depends both on their ability to exchange  
45 subunits along the filaments <sup>21,22</sup>, and on posttranslational modifications <sup>23,24</sup>. Oxidative and  
46 electrophilic modifications of vimentin induce dramatic alterations in VIF architecture and  
47 meshwork organization <sup>25,26</sup>.

48 Similar to other types of IF proteins <sup>27</sup>, vimentin contains an elongated, central rod domain  
49 composed of four coiled-coil  $\alpha$ -helical segments, termed 1A, 1B, 2A, and 2B, respectively, that  
50 are connected by flexible linkers. In turn, the rod domain is flanked by intrinsically disordered  
51 N-terminal head (H) and C-terminal tail (T) domains (Fig. 1a). Vimentin monomers assemble  
52 into parallel homodimers <sup>28</sup>, ~49 nm in length <sup>29</sup>. Snapshots into vimentin assembly in-vitro  
53 suggested that two dimers interact to form an antiparallel tetramer <sup>30</sup>, with a length of ~61 nm  
54 and a molecular mass of ~214 kDa <sup>27,29</sup>. This tetramer is the basic building block for the  
55 subsequent assembly of VIFs <sup>22,31</sup>.

56 The next steps in the hierarchy of vimentin polymerization involve the lateral and longitudinal  
57 concatenation of tetramers into higher order structures that contain multiples of 4 vimentin  
58 polypeptide chains. These higher order structures assemble into protofilaments (tetramers

59 attach longitudinally, 4 monomers in cross-section)<sup>27</sup>, protofibrils (8 monomers in cross-  
60 section)<sup>32</sup>, and forming unit-length filaments (ULFs)<sup>33-36</sup>, structures which are highly variable  
61 regarding their molecular mass (32, 40, or 48 monomers in cross-section). Ultimately, ULFs  
62 fuse longitudinally to form mature VIFs<sup>31,37,38</sup>.

63 The extensive structural polymorphism of VIFs together with their elongated, flexible building  
64 blocks and intrinsically disordered domains, impose major challenges for the determination of  
65 their 3D structure. Nevertheless, a divide and conquer X-ray crystallographic analysis of  
66 overlapping vimentin fragments have provided an atomistic model of the nearly complete rod  
67 domain<sup>39</sup>. Based on molecular dynamic simulations much of the structure of the vimentin  
68 tetramer has been determined<sup>29,40,41</sup>. Despite this progress, the structure of VIFs in their fully  
69 assembled filamentous state within cells is required for a deeper understanding of the unique  
70 properties and many functions of VIFs.

71 Here, we have determined the structure of in-vivo polymerized VIFs employing cryo-electron  
72 tomography (cryo-ET) and helical reconstruction procedures. Through the classification of  
73 filament segments and the assembly of class averages into filaments of substantial length, we  
74 have been able to uncover the polymorphism along the VIFs. Disentangling individual filament  
75 states, a 3D reconstruction of VIFs has been achieved providing subnanometer resolution.

76 VIFs feature a helical assembly of 5 spring-like protofibrils built from the 1B, 2A, and 2B  
77 domains of vimentin and the protofibrils are linked together by the 1A and H domains. Our  
78 analysis provides detailed insights into the architecture of VIFs and reveals the role of  
79 individual vimentin domains within the filament structure.

80

81

82

## 83 RESULTS

84 **Cryo-ET of VIFs.** Mouse embryonic fibroblasts (MEFs) are widely used for investigating the  
85 cellular organization and function of VIFs. In this study we used MEFs that form a typical VIF  
86 network as revealed by 3D structured illumination microscopy (3D-SIM) imaging (Fig. 1b). The  
87 cells were cultured on electron microscopy grids and subjected to a permeabilization  
88 procedure that preserves the VIF network, while removing soluble components from the  
89 cytoplasm and the nucleus <sup>42</sup>. The VIF networks in detergent treated cells closely resemble  
90 those of intact cells (Supplementary Fig. 1a).

91 Using these MEF preparations, we acquired 225 cryo-tomograms in areas with varying  
92 numbers of VIFs (Fig. 1c, Supplementary Fig. 1b, Supplementary Movie 1). The VIFs exhibit  
93 a tube-like appearance with no indications of partial unravelling, suggesting a reduced  
94 heterogeneity in comparison to the results obtained with bacterial expressed vimentin  
95 assembled into VIFs in-vitro <sup>43</sup>. Using a convolutional neural network <sup>44</sup>, we identified and  
96 extracted 390,297 segments of VIFs with a box size of 65 x 65 x 65 nm<sup>3</sup>. These segments  
97 were projected along the direction of the electron beam and subsequently subjected to a 2D  
98 classification procedure <sup>45,46</sup> (Supplementary Fig. 1c). Surprisingly, this classification revealed  
99 two distinct structural patterns in VIFs (Supplementary Fig. 2); one is helical-like and the other  
100 is rope-like in appearance. We term these VIF state-1 and VIF state-2, respectively.

101

102 **Repeat distance and power spectrum analysis.** VIF state-1 class averages (Fig. 1d,  
103 Supplementary Fig. 3a) reveal two tracks of a repeating pattern of elongated, low-density  
104 regions, which are displaced relative to each other, run parallel to the outer boundaries of the  
105 filament, and are accompanied by local increases of curvature and outward protrusions  
106 (Fig. 1d, yellow asterisks). The repeat distance of the pattern is ~180 Å, as measured by  
107 autocorrelation analysis <sup>47</sup> (Supplementary Fig. 3b). Additionally, the class averages reveal  
108 that one filament wall appears more pronounced in projection than its counterpart (Fig. 1d,  
109 blue arrowheads), which suggests an odd number of subfilamentous entities building the  
110 filaments (Supplementary Fig. 3c).

111 Subsequently, we combined all state-1 class averages into a common power spectrum, which  
112 shows helical layer lines (Fig. 1e), thereby confirming the helical symmetry of state-1 VIFs.  
113 A clearly detectable layer line is positioned at  $\sim 1/186 \text{ \AA}$ , which corroborates the previous  
114 autocorrelation measurement. Moreover, the Bessel peak distribution along the layer line  
115 spectrum is compatible with a helical assembly that packs five building blocks in one helical  
116 pitch, which would correspond to the observed asymmetry in the class averages.  
117 Consequently, on the fifth layer line, which is positioned at  $\sim 1/37 \text{ \AA}$  (Fig. 1e, blue rectangle), a  
118 meridional peak can be detected.

119

120 **Determining the helical symmetry of VIFs.** We confirmed the helical indexing scheme by an  
121 exhaustive helical parameter search on both filament states. Therefore, we merged all vimentin  
122 segments into one stack of particles (133,780 segments of size  $65 \times 65 \text{ nm}^2$ ) and performed  
123 an initial helical 3D classification. In order to understand the basic diameter and low-resolution  
124 features of the six class averages obtained, all helical information was discarded in the first  
125 instance and the 3D class averages were fully symmetrized along their central axis.

126 Interestingly, the class averages differ in the presence of a luminal density along their central  
127 axis (Supplementary Figs. 4a&b). Determinations of their diameter suggest that the increases  
128 in the diameter of VIFs coincide with increases in luminal density (Supplementary Fig. 4c). The  
129 maximum diameter difference detected is  $\sim 2 \text{ nm}$ . The outer tube diameter is  $12.7 \text{ nm} \pm 0.7 \text{ nm}$   
130 and the centre-to-centre distance between the tube walls is  $9.4 \text{ nm} \pm 0.8 \text{ nm}$  with a tube wall  
131 thickness of  $3.3 \text{ nm} \pm 0.4 \text{ nm}$ . Based on these measurements, we define VIF state-1 as those  
132 polymers exhibiting a pronounced luminal density and VIF state-2 missing the distinct mass  
133 along their central axis.

134 In the following, we examined whether the two polymer states are similar with respect to their  
135 helical symmetry, so that their primary structural difference would be caused by the luminal  
136 density. Therefore, we used the particle sets of the six class averages from before as separate  
137 inputs for a series of unbiased, helical 3D refinements<sup>48,49</sup>, assuming that the true helical  
138 symmetry generates optimal resolution. Thereby, we searched through a wide spectrum of

139 helical rise values from 30 Å to 69 Å at a constant helical pitch of 186 Å. This brute-force search  
140 visited a wide range of helical geometries that contain between 2.7 to 6.2 asymmetric units in  
141 the helical pitch length. The results show that four classes reached optimal resolution values  
142 around a helical rise of 37 Å (Supplementary Fig. 4d), and the mean resolution over all classes  
143 is optimal at a helical rise of ~37 Å (Supplementary Fig. 4e). Subsequently, we applied the  
144 helical symmetry obtained for 3D classification of the vimentin segments and confirmed that  
145 the features of the reconstructed class averages in projection match the experimental 2D class  
146 averages (Supplementary Fig. 4f).

147 The results of our analyses reveal that the helical symmetries of VIF state-1 and VIF state-2  
148 are similar to a first approximation, indicating therefore the luminal density does not  
149 significantly alter the helical symmetry of the surrounding filament tube. In order to assess the  
150 validity of the helical rise measurements, we assumed a closely-packed helical structure, so  
151 that the helical rise could be estimated based on the helical pitch and the filament diameter<sup>50</sup>.  
152 Here, a helical pitch of 186 Å and a filament diameter of 12.7 nm results in a helical rise of  
153 36.8 Å, and the maximum diameter difference of ~2 nm between the two polymer states is  
154 implying a variation in the helical rise between 36.1 Å and 37.5 Å. This interval defines the  
155 theoretical difference between VIF state-1 and VIF state-2 in terms of the helical rise, that is  
156 compatible with the measured diameter polymorphism of VIFs (Supplementary Fig. 4c).

157 Three independent sets of measurements consistently reveal a helical pitch of ~186 Å and a  
158 helical rise of ~37 Å. These values are in agreement with cross-linking experiments suggesting  
159 a helical rise of 35.5 Å for VIFs ( $z_a$  value in<sup>51</sup>), as well as scanning transmission electron  
160 microscopy mass-per-length measurements. Assuming that the vimentin tetramer is the  
161 asymmetric unit of the helical assembly<sup>22,31</sup>, a mass-per-length of 56 kDa/nm (third peak in  
162 Fig. 9a in<sup>33</sup>) directly<sup>52</sup> yields a helical rise of 38.3 Å.

163

164 **Long-range tracing of VIFs.** Resolving the structural fluctuations along the VIFs requires the  
165 reconstruction of extended polymer stretches<sup>45,53</sup>. Therefore, we extracted smaller segments  
166 (38 x 38 nm<sup>2</sup>) and decreased the distance separating them, in order to increase the number of

167 samples to more accurately track the natural bending of the VIFs. After several rounds of 2D  
168 classification, the initially selected ~1.1 million particles were concentrated to 615,106  
169 segments and grouped into 100 class averages (Supplementary Fig. 5). These class averages  
170 were then transformed, so that their position and orientation matched the corresponding raw  
171 segments, and by this means the VIFs were assembled from the class averages. As a result,  
172 their signal-to-noise ratio is greatly improved compared to the raw images of VIFs. An example  
173 of an assembled VIF is shown in Fig. 2a. The change in structural patterns along a single VIF  
174 can be observed over a substantial length. To complete the long-range tracing of VIFs, we  
175 applied a straightening procedure to unbend the filaments<sup>1,54</sup>.

176 In total, we assembled 5205 VIFs of different lengths (Fig. 2b). We selected a subgroup of 389  
177 of these VIFs with a length of  $\geq 353$  nm. These were boxed to an equal length (1024 pixel) and  
178 we measured the repeat distance along these VIFs employing autocorrelation (Fig. 2c). The  
179 result showed a long-range repeat distance of  $186.5 \text{ \AA} \pm 26.0 \text{ \AA}$ , supporting the previous  
180 measurements on single class averages.

181 Next, we calculated a combined power spectrum of these VIFs (Fig. 2d). Due to the increased  
182 resolution, a dense spectrum of layer lines is revealed and Bessel peaks confirming the  
183 previously measured helical pitch and rise values can be clearly detected (Fig. 2d, yellow  
184 arrowheads). The inset in Fig. 2d focuses on the most significant Bessel peaks above the  
185 background, in a region around the putative helical pitch. The layer line at  $185.6 \text{ \AA} \pm 4.9 \text{ \AA}$   
186 (yellow rectangle) confirms the previous helical pitch measurements and a subtle splitting of  
187 the layer lines can be observed (yellow arrowheads).

188 These results support the notion that the helical pitch of VIFs is determined by a characteristic,  
189 constant length within the vimentin tetramer. Indeed, it was shown based on molecular  
190 dynamics simulation<sup>29</sup> and cross-linking experiments<sup>55</sup> that the lateral stagger of the tetramer  
191 in the  $A_{11}$  binding mode (characterized by largely overlapping 1B domains) is similar to the  
192 helical pitch length which we have determined here. However, if the lateral spacing between  
193 the subfilamentous entities within the filaments can be modulated, for example due to post-  
194 translational modifications<sup>23</sup>, the number of tetramers that can be packed into the constant

195 helical pitch length will vary <sup>56</sup>. This would result in fluctuations of both helical rise and filament  
196 diameter (Supplementary Fig. 4c), and ultimately creates a high density of layer lines in the  
197 power spectrum.

198 In order to substantiate this view of a fine-tuned molecular packing of VIFs, the atomic model  
199 of the vimentin tetramer <sup>29</sup> was placed in one of the previously generated fully symmetric  
200 averages (Supplementary Fig. 4a), and subsequently helical symmetrisation was applied. In  
201 this way, VIF models of defined length and helical symmetry were produced, converted into  
202 electron density maps, and then simulated power spectra were computed. In turn, the similarity  
203 between the simulated power spectra and the experimentally obtained power spectrum of VIFs  
204 (Fig. 2d) was measured by cross-correlation.

205 Based on this procedure we simulated filament geometries with a packing of 4.5 to 5.5 vimentin  
206 tetramers into a constant helical pitch length of 185.6 Å. The resulting cross-correlation curve  
207 showed that the similarity between the power spectra simulations and the experimentally  
208 derived power spectrum is maximized for a packing of  $4.95 \pm 0.05$  tetramers (Fig. 2e).  
209 Consequently, the helical symmetry of VIFs in-situ is compatible with a fine-tuned molecular  
210 packing that converges to five tetramers in one helical pitch.

211 We also sought to determine the structural features and distribution of the two polymerization  
212 states along the VIFs. To this end, we conducted a helical 3D classification of the vimentin  
213 segments in four classes (Supplementary Fig. 6a). We assigned two classes with luminal  
214 density as VIF state-1 (324,386 particles) and two classes without this density as VIF state-2  
215 (290,720 particles). Subsequently, we identified the respective segment positions along the  
216 assembled filaments, added a binary label that encodes the luminal density filling state, and  
217 calculated a score for each filament, reflecting its fraction of state-1 segments.

218 Based on this score, we calculated the two filament profiles shown in Fig. 2f. Here, we  
219 averaged the radial profiles of two sets of 300 assembled VIFs (length  $\geq 22$  nm), either with  
220 maximal or minimal luminal density score (blue and red profiles, respectively). The mean outer  
221 diameter of the VIFs in projection is  $10.9 \text{ nm} \pm 1.2 \text{ nm}$ . The blue profile indicates a pronounced  
222 luminal density in state-1 VIFs, whereas the red profile shows clearly that the luminal density



223 in state-2 VIFs is reduced and their filament boundaries are more oriented towards the less  
224 dense filament lumen. The different structural motifs of the two states along the VIFs are clearly  
225 detected and it appears that segments in the same state form clusters along the VIFs (Fig. 2g,  
226 blue and red dots, respectively).

227

228 **Reconstruction of VIFs at subnanometer resolution.** In order to determine the 3D structure  
229 of VIFs, we selected a class of 58,952 vimentin state-1 segments (Supplementary Figs. 6a-c)  
230 for further refinement. The helical parameters of the selected segments were validated by an  
231 exhaustive search (Supplementary Figs. 6d&e) and used as starting values for a 3D  
232 refinement procedure employing a local helical symmetry search using the RELION helical  
233 toolbox<sup>48</sup>. The refinement procedure converged to a helical rise of  $h_r=37.1$  Å and a helical twist  
234 of  $t_r=71.9^\circ$ , which translates into  $n=5.0$  asymmetric units packed into a helical pitch of 185.8 Å.  
235 The corresponding layer lines are annotated in Fig. 2d (yellow arrowheads).

236 The 3D structure of state-1 VIFs was resolved to 9.6 Å (Supplementary Fig. 7). The  
237 reconstruction is shown as a whole in Fig. 3a. A cut open view is presented in Fig. 3b  
238 containing the luminal density as it proceeds along the central axis of the filament. In  
239 cross-section the luminal density appears elliptical, with one axis of  $3.7$  nm  $\pm$  0.3 nm and the  
240 second axis of  $3.1$  nm  $\pm$  0.3 nm. Furthermore, the luminal density is oriented towards identical  
241 positions along the filament tube in steps of the helical pitch (Fig. 3b, squares).

242 Our analysis shows that in-situ polymerized VIFs are tube-like structures formed by 5 units,  
243 presumably protofibrils<sup>32</sup> composed of 2 tetramers in cross section (see below). In Fig. 3c we  
244 show three regions of a protofibril. The rod region (rectangle-1) is an elongated density along  
245 a protofibril that is delimited from the neighbouring protofibrils by openings in the structure.  
246 Along a protofibril, the rod region transitions into the hub region (rectangle-2), which can be  
247 identified by a characteristic triplet pattern. Interestingly, laterally staggered to the rod and hub  
248 regions, discrete densities that bridge between neighbouring protofibrils can be identified  
249 (rectangle-3). We propose that these regions serve as glue domains responsible for  
250 maintaining the structural integrity of VIFs by anchoring neighbouring protofibrils. Seen from

251 inside of the VIF (Fig. 3d), the interactions of the protofibrils through the glue regions are  
252 apparent, and in Fig. 3e the complete repeating unit of a protofibril is shown.

253 In order to determine the molecular architecture of the VIFs, we constructed a model based on  
254 the measured helical symmetry and the atomic model of the vimentin tetramer<sup>29</sup>. The  
255 consistency of the VIF model with the experimentally obtained structure was validated by  
256 docking, reaching a correlation coefficient of 0.81 (Supplementary Fig. 8, Supplementary  
257 Movie 2). The VIF model (Fig. 4, Supplementary Movie 3) reveals 8 vimentin polypeptide  
258 chains in cross-section of a protofibril and therefore 40 in cross-section of a filament<sup>36</sup>. Another  
259 direct consequence of the helical symmetry which we have obtained is the mass-per-length of  
260 the VIF model (57.8 kDa/nm), which perfectly matches the data obtained by scanning  
261 transmission electron microscopy<sup>33,34</sup>.

262 The model we have derived from our analyses shows that the rod region of a protofibril is  
263 assembled by interactions between the 1B and 2B domains of adjacent vimentin protein chains  
264 (Fig. 4a, rectangle-1). Further along a protofibril, the 2B domains enter the hub regions  
265 (Fig. 4a, rectangle-2), where the 2A domains are concentrated and T domains are protruding  
266 from the surface of the VIFs, explaining the protrusions previously detected in the class  
267 averages (Fig. 1d, yellow asterisks). Furthermore, the 1A domains extend from the hub regions  
268 into the space between the protofibrils. Together with the H domains the 1A domains form the  
269 glue regions (Fig. 4a, rectangle-3).

270 A cross section view of the VIF model is shown in Fig. 4b. This view highlights the essential  
271 role of the 1A and H domains for filament assembly, in agreement with the findings in previous  
272 studies<sup>18,28,33,57</sup>. Clearly, the model shows that the 1A and H domains are the links between  
273 the spring-like protofibrils, as visualized by omitting the respective vimentin domains in the  
274 filament model (Fig. 4c).

275 A model of the vimentin ULF<sup>34</sup> is shown in Fig. 4d. Interestingly, both ends of the ULF are  
276 formed by the 2B and T domains of the vimentin protein, suggesting that these domains play  
277 a vital role in the elongation of VIFs. Indeed, a mimetic peptide that interferes with the 2B  
278 domain drastically alters the formation of ULFs and their longitudinal annealing, as

279 demonstrated in a previous study<sup>28</sup>. Assembly of a VIF with a cross section of 40 polypeptide  
280 chains requires at least two helix-turns, i.e. 10 tetramers. An alternative ULF model constructed  
281 from 5 tetramers and an elongated VIF model are presented in Supplementary Fig. 9.

282

## 283 **DISCUSSION**

284 In this work we reveal the structure of VIFs. We have generated a molecular model of VIFs  
285 that maps the position and spatial relationships of the vimentin protein domains within the  
286 polymer and explains its general building principles (Supplementary Fig. 10). The precision of  
287 the VIF model largely depends on two factors, the accuracy of the measured helical symmetry  
288 and the fidelity of the vimentin tetramer model<sup>29,40</sup>. Since the measured helical symmetry  
289 ( $h_f=37.1 \text{ \AA}$ ,  $t_f=71.9^\circ$ ) provides a subnanometer resolved 3D reconstruction of the VIFs, and  
290 agrees with previous mass-per-length measurements<sup>33,34</sup> and results obtained from cross-  
291 linking experiments<sup>51,55</sup>, our model permits a high precision position and spatial relationship  
292 determination of the vimentin protein domains building VIFs.

293 The observed molecular architecture of in-situ polymerized VIFs is in excellent agreement with  
294 previously published results. These include the established roles of the highly conserved 1A  
295 and 2B domains in VIF assembly and elongation<sup>18,28,33,57</sup>, the contribution of the H domains to  
296 the lateral interactions between the protofibrils<sup>23</sup>, and the number of polypeptide chains per  
297 cross-section<sup>36</sup>. Since the VIF model predicts an alternating pattern of A<sub>11</sub> and A<sub>12</sub> tetramer  
298 binding interfaces along a protofibril, the VIF model explains the previously determined cross-  
299 links as well<sup>27,32,55</sup> (Supplementary Fig. 10b).

300 However, the subnanometer structural determination of the VIFs does not reveal their  
301 handedness. Since the sign of the helical twist angle is a priori undetermined and the map  
302 resolution is not sufficient to directly derive it, we set  $-t_f$ , so that the protofibrils coil around the  
303 helical axis in a left-handed manner, in agreement with previous considerations based on  
304 structural hierarchy<sup>27</sup>.

305 Interestingly, cellular VIFs form a homogenous assembly with respect to the number of  
306 polypeptide chains per cross-section (40 vimentin monomers), compared to in-vitro assembled

307 VIF preparations, where the distribution is more heterogenous (32, 40, and 48 vimentin  
308 monomers)<sup>33,34,36</sup>, suggesting that the cell selectively controls the polymerization of the VIFs.  
309 Furthermore, no regions containing unravelled VIFs were detected in the tomograms, as  
310 described for VIFs polymerized in-vitro from bacterial expressed vimentin<sup>43</sup>.  
311 Nevertheless, the VIFs polymerized within cells exhibit considerable polymorphism. Indeed,  
312 we observed that the VIFs exist in two major polymerization states, which are characterized  
313 by the presence of a luminal density in state-1 VIFs, and their absence or significant  
314 suppression in state-2 VIFs. Following the course of single VIFs demonstrate that transitions  
315 between these two states are common. As a consequence, the diameter of VIFs varies locally  
316 with a maximum difference of ~2 nm, which implies fluctuations in the helical rise between  
317 36.1 Å and 37.5 Å, assuming a constant helical pitch. Although this variability cannot be  
318 neglected for 3D structural determination, it has only a minor influence on the general  
319 architecture of VIFs. Therefore, we suggest that the tube-like structures of state-1 and state-2  
320 are similar, but the main difference is the luminal density. The molecular identity of the luminal  
321 density is still not clear, although, it is likely composed of vimentin protofilaments.  
322 The VIF structures described in this analysis are likely to retain many, if not all of their in-vivo  
323 regulated post-translational modifications and therefore are in a near native state reflecting  
324 their in-vivo structural parameters. This ensures that we are studying the assembly and  
325 structure of physiologically relevant VIFs, without the requirement for the denaturing and  
326 renaturing procedures typically used in studies of VIF structure, and without the prerequisite  
327 to define the conditions for the polymerization in-vitro.  
328 In the future, the strategy developed for this study can be applied to reveal the structure of  
329 VIFs in a variety of cellular states, and can be utilized as a starting point for the structural  
330 characterization of other members of the IF superfamily of cytoskeletal proteins. Larger  
331 datasets in conjunction with future developments in image processing will make it possible to  
332 resolve complete IF structures at atomic resolution.  
333  
334

335 **Acknowledgements**

336 This work was funded by grants from the Swiss National Science Foundation (SNSF  
337 31003A\_179418) and the Mäxi Foundation to O.M. We thank the Center for Microscopy and  
338 Image Analysis at the University of Zurich.

339

340 **Author contributions**

341 M. E. analyzed cryo-electron microscopy data and developed the methods. M. S. W. and Y. T.  
342 prepared samples and recorded cryo-electron microscopy data. S. S. prepared samples and  
343 recorded light microscopy data. M. E. together with R. D. G. and O. M. conceived the research  
344 and wrote the manuscript.

345

346 **Declaration of interests**

347 The authors have no conflicts of interest to declare.

348

349 **Corresponding author**

350 Correspondence to Ohad Medalia ([omedalia@bioc.uzh.ch](mailto:omedalia@bioc.uzh.ch))

351

352

353

354 **FIGURES**

355

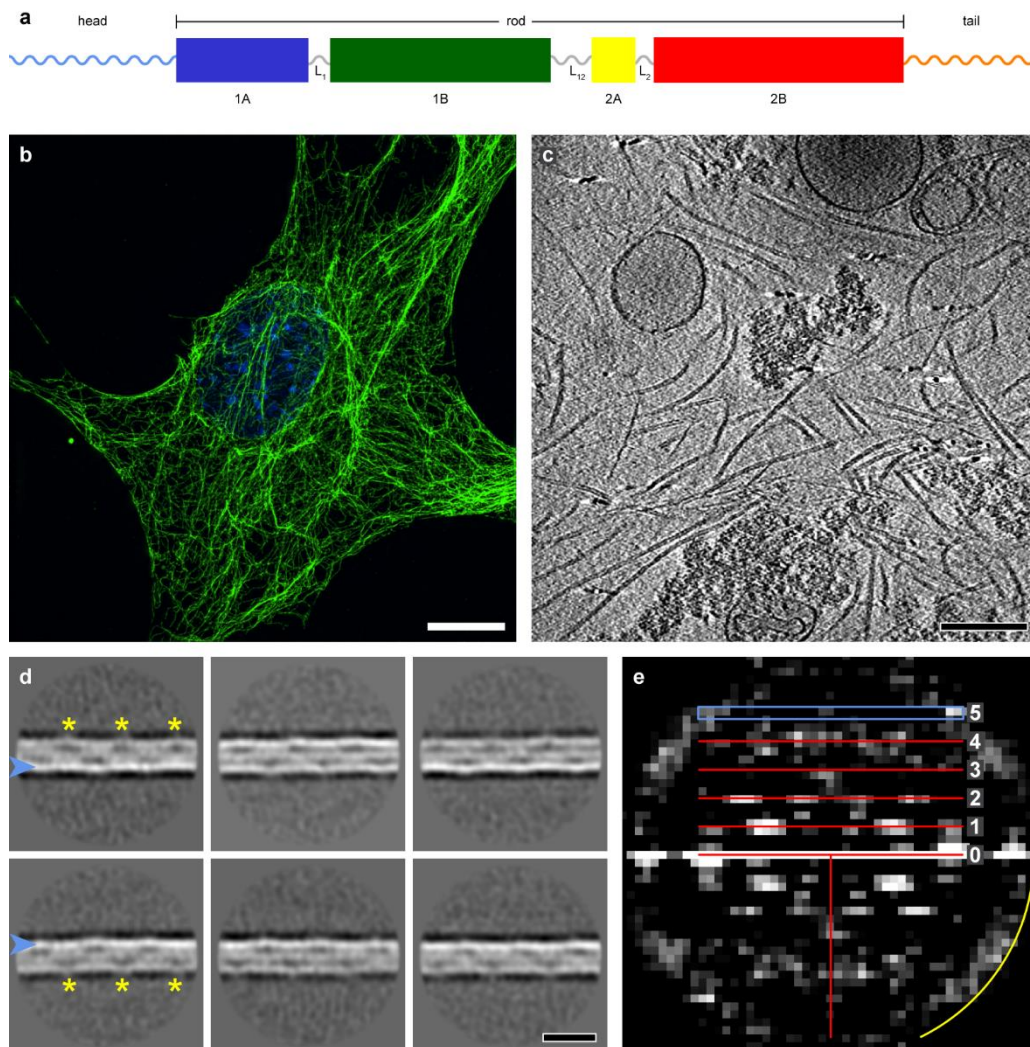

356

357 **Figure 1. Cryo-ET and power spectrum analysis of VIFs.** (a) Domain organization of a  
358 vimentin monomer. The central rod consists of predominantly alpha-helical domains (1A, 1B,  
359 2A, 2B), connected by flexible linkers (L1, L12, L2). The rod is flanked by intrinsically  
360 disordered head and tail domains. (b) Slice of a 3D-SIM image of a MEF, fixed and stained  
361 with anti-vimentin (green) and the nucleus is stained with DAPI (blue). The VIF network  
362 extends over the whole cellular volume, with regions of lower and higher network density, and  
363 forms a cage around the nucleus. Scale bar is 10  $\mu\text{m}$ . (c) Slice through a cryo-tomogram of a  
364 detergent treated MEF. The VIFs can be clearly detected. They consistently show no  
365 unravelling over the whole dataset. (d) The VIF state-1 class averages show a helical pattern

366 with a repeat distance of  $\sim 180$  Å (yellow asterisks). One side of the filament boundary appears  
367 pronounced in projection (blue arrowheads). Scale bar is  $180$  Å. (e) Combined power spectrum  
368 of the VIF state-1 class averages. The presence of layer lines confirms the helical architecture.  
369 The first layer line appears at  $\sim 1/186$  Å and reflects the repeating pattern observed in the class  
370 averages. The layer line and peak distribution with a meridional reflection on the fifth layer line  
371 at  $\sim 1/37$  Å is compatible with a helical assembly of five subunits per repeat. The yellow arc in  
372 the power spectrum indicates  $1/26$  Å.

373

374

375

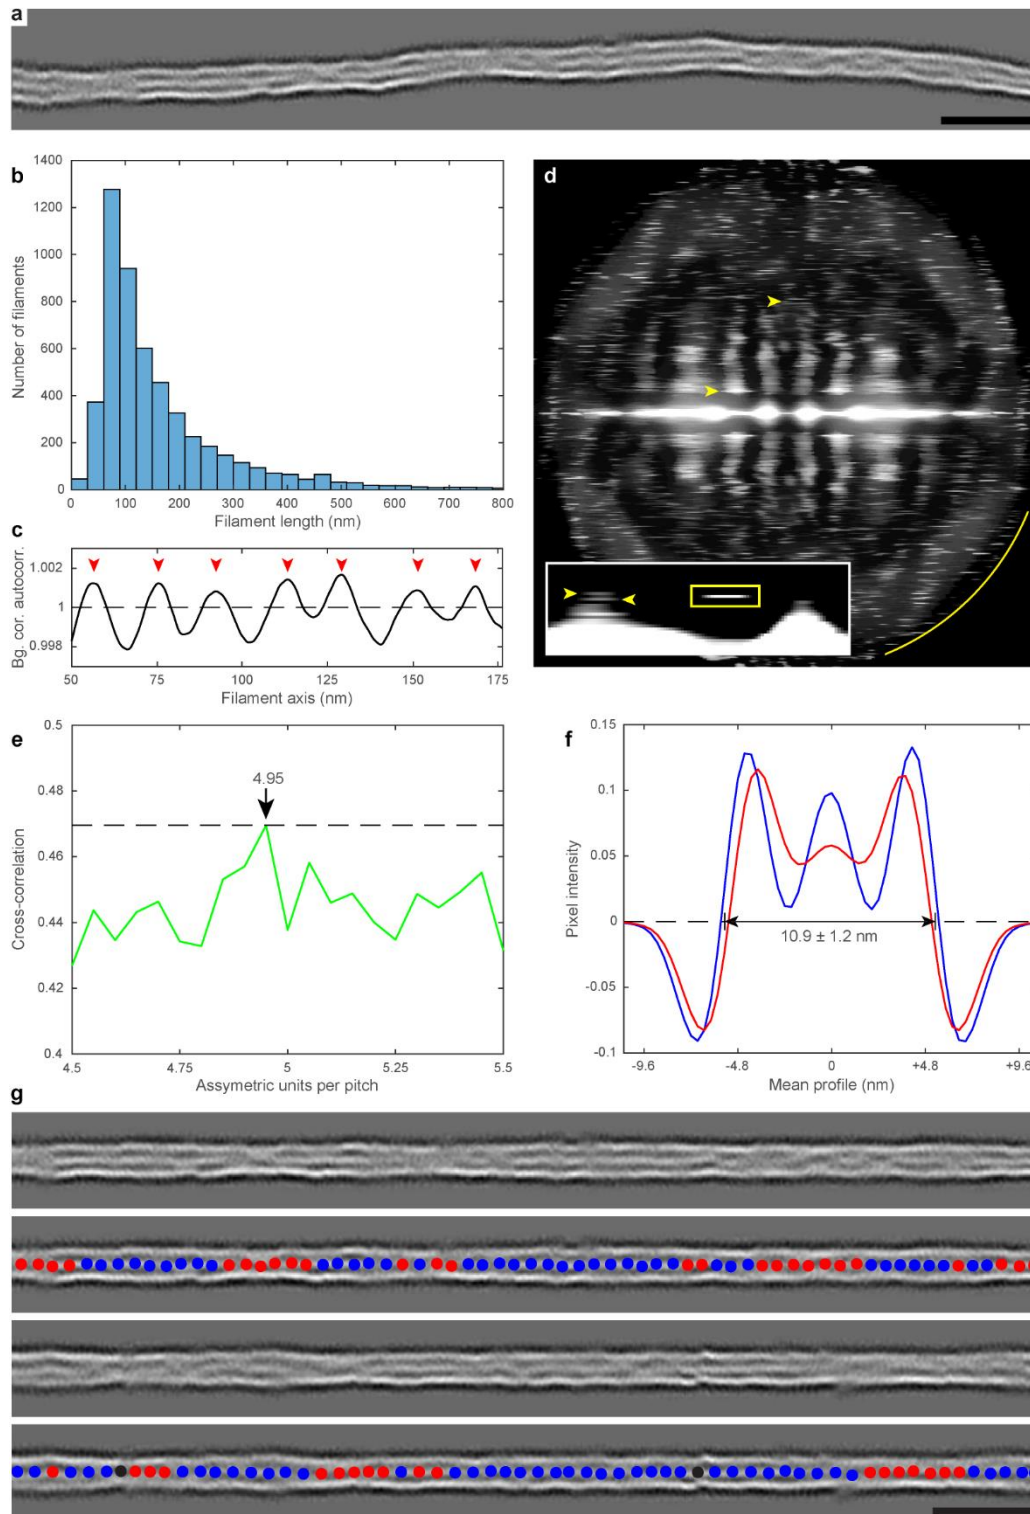

376

377 **Figure 2. Long-range structural patterns of VIFs.** (a) Filament assembly allows to follow the  
378 progression of the VIFs with improved signal-to-noise ratio over a substantial length. Scale bar  
379 is 35 nm. (b) Length distribution of the assembled filaments. (c) The long-range repeat  
380 distance of the VIFs was measured. The plot shows the autocorrelation signal after  
381 background correction. The mean distance between the red arrowheads is  $186.5 \text{ \AA} \pm 26.0 \text{ \AA}$ .



382 **(d)** The assembled VIFs were combined into one power spectrum. A dense pattern of layer  
383 lines can be detected, reflecting the diffraction pattern of a discontinuous helix. The final  
384 structure of state-1 VIFs converged to a helical pitch of 185.8 Å and a helical rise of 37.1 Å. At  
385 both positions sharp layer lines can be detected in the power spectrum (yellow arrowheads).  
386 The yellow arc indicates  $1/16$  Å. In the inset at the putative pitch region a sharp layer line  
387 (yellow rectangle) can be detected at  $185.6 \text{ Å} \pm 4.9 \text{ Å}$ . It can be observed that the layer lines  
388 split into triplets (yellow arrowheads). **(e)** The splitting of the layer lines was modelled. At a  
389 packing of  $4.95 \pm 0.05$  vimentin tetramers in the length of a helical pitch the similarity between  
390 the experimental power spectrum and the simulated power spectra is maximized, thereby  
391 confirming the helical indexing scheme based on long-range structural patterns of VIFs.  
392 **(f)** Two radial profiles along VIFs in state-1 and state-2 are plotted (blue and red curves,  
393 respectively). In state-1 the luminal density is almost as dense as the filament walls. In state-2  
394 the luminal density appears suppressed and the filament walls move inwards. **(g)** Two  
395 assembled VIFs are shown. The blue and red dots along the filament axis indicate the position  
396 of state-1 and state-2 segments, respectively. Scale bar is 35 nm.

397

398

399

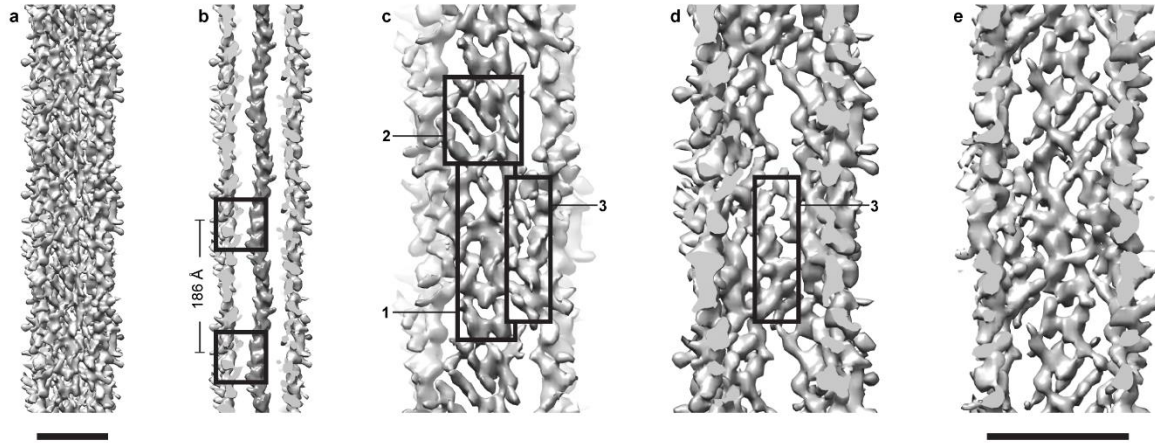

400

401 **Figure 3. Helical 3D reconstruction of state-1 VIFs.** (a) View of the complete structure of a

402 vimentin state-1 polymer. Scale bar is 10 nm. (b) Cut open view of the VIF structure. The

403 luminal density proceeds along the central axis and is oriented towards identical positions

404 along the filament tube every  $\sim 186 \text{ \AA}$ , as indicated by the two squares.

405 (c) Front view of one of the five protofibrils. The repeating unit can be subdivided into three characteristic regions.

406 The first region (rectangle-1) exhibits a rod like structure, that runs parallel to the filament axis.

407 The rod region is continuous with the triplet pattern of the hub region (rectangle-2). Densities

408 that connect the protofibrils (the glue regions, rectangle-3) are staggered laterally relative to

409 the rod and hub. (d) View from inside the VIF tube in one of the glue regions (rectangle-3).

410 (e) View from inside the filament tube in the repeating unit of a protofibril. Scale bar is 10 nm.

411

412

413

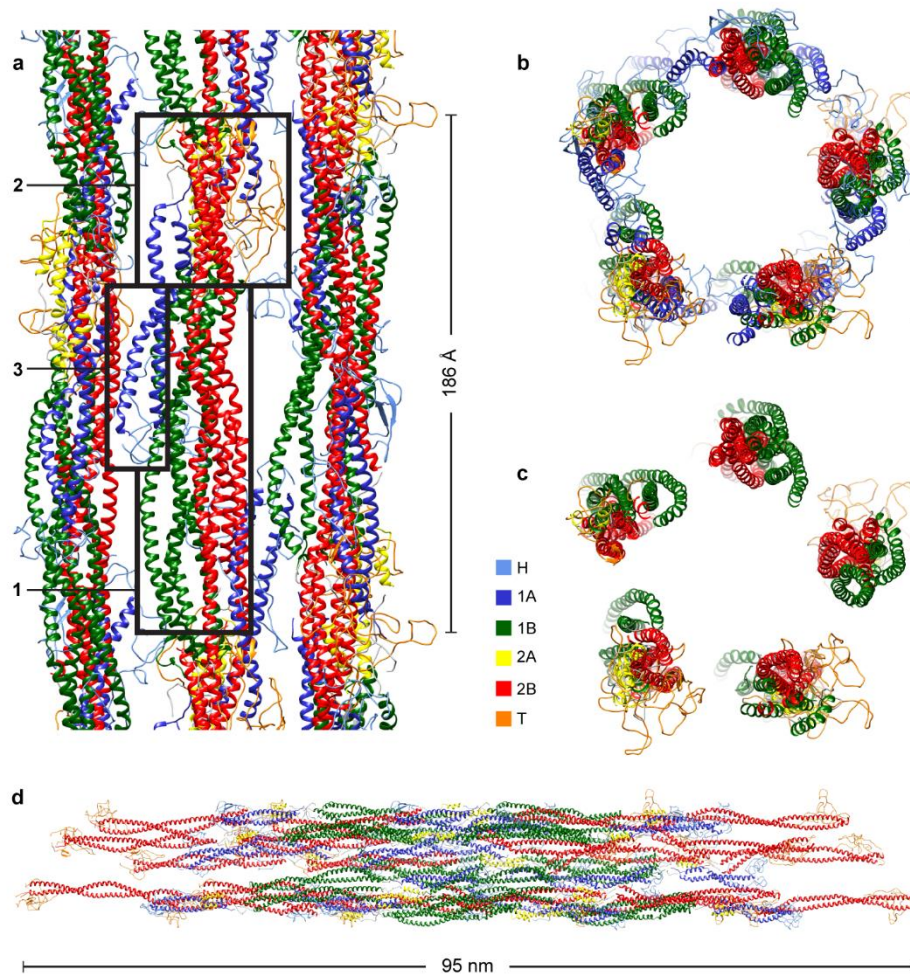

414

415 **Figure 4. Molecular model of VIFs.** (a) The VIF model indicates that the rod regions  
416 (rectangle-1) are assembled from parallel aligned 1B and 2B domains. In the hub regions  
417 (rectangle-2) the 2A domains are concentrated and the T domains are protruding away from  
418 the filament surface. Furthermore, from the hub regions the 1A domains extend into the space  
419 between the protofibrils where they form together with the H domains the glue regions  
420 (rectangle-3). The different protein domains are color-coded according to the color key.  
421 (b) Cross-section view of the VIF model. The five protofibrils are linked together by the 1A and  
422 H domains. Scale bar is 3 nm. (c) This becomes evident by omitting the 1A and H domains in  
423 the cross-section view. (d) Molecular model of an ULF. The 2B and T domains are accessible  
424 at both ends.

425

426

427 **METHODS**

428 **Cell lines and cell culture.** The MEFs were cultured in DMEM (Sigma-Aldrich, D5671)  
429 supplemented with 10% FCS (Sigma-Aldrich, F7524), 2 mM L-Glutamine (Sigma-Aldrich,  
430 G7513) and 100 µg/ml penicillin/streptomycin (Sigma-Aldrich, P0781), at 37°C and 5% CO<sub>2</sub> in  
431 a humidified incubator.

432

433 **Light microscopy.** Sub-confluent cultures of MEFs growing on #1.5 glass coverslips were  
434 fixed with 4% paraformaldehyde for 10 min at RT. The fixed cells were permeabilized with  
435 0.1% Triton-X 100 for 10 min at RT and then incubated with chicken anti-vimentin (1:200,  
436 919101, Biolegend, CA, USA) for 30 min in phosphate buffered saline (PBS) containing 5%  
437 normal goat serum. This was followed by staining with goat anti-chicken Alexa Fluor 488  
438 (1:400, A-11039, Invitrogen, CA) and DAPI in phosphate buffered saline for 30 min. The  
439 stained cells were mounted with ProLong Glass Antifade Mountant (Life technologies,  
440 Carlsbad, CA, USA).

441 MEFs were seeded on #1.5 glass coverslips and the next day they were washed with  
442 PBS/2 mM MgCl<sub>2</sub> for 5 s followed by incubation with PBS containing 0.1% Triton X-100,  
443 10 mM MgCl<sub>2</sub>, 0.6 M KCl and protease inhibitors for 25 s at RT. The cells were rinsed with  
444 PBS/2 mM MgCl<sub>2</sub> for 10 s and subsequently incubated with 2.5 units/µl Benzonase for 30 min  
445 at RT. After rinsing with PBS/2 mM MgCl<sub>2</sub> the cells were fixed with 4% paraformaldehyde for  
446 5 min at RT. The fixed cells were then stained with chicken anti-vimentin (1:200, 919101,  
447 Biolegend, USA) and rabbit anti-lamin A (to determine the location of the nucleus) in PBS  
448 containing 5% normal goat serum for 30 min at RT followed by incubation with goat anti-  
449 chicken and anti-rabbit secondary antibodies (1:400, A-11039, A-11011, Invitrogen, USA) for  
450 30 min at RT. Following washing in PBS, the stained cells were mounted with Prolong Glass  
451 Antifade Mountant (Life technologies, Carlsbad, CA, USA).

452 3D-SIM imaging was carried out with a N-SIM Structured Illumination Super-resolution  
453 microscope system (Nikon, Tokyo, Japan) using an oil immersion objective lens  
454 (SR Apo TIRF100X, 1.49 NA, Nikon). For 3D SIM, 26 optical sections were imaged at 100 nm

455 interval. The raw SIM images were reconstructed with the N-SIM module of Nikon Elements  
456 Advanced Research with the following parameters: illumination contrast, 1.00, high-resolution  
457 noise suppression, 0.75, and out-of-focus blur suppression, 0.25. Brightness and contrast were  
458 adjusted for image presentation.

459

460 **Cryo-ET sample preparation.** MEFs were grown to ~80% confluency on glow-discharged  
461 holey carbon EM grids (R2/1, Au 200 mesh; Quantifoil, Jena, Germany) prior to preparation  
462 for cryo-ET analysis. Grids that showed a relatively homogenous distribution of cells were  
463 selected using fine tweezers, and then washed in PBS/2 mM MgCl<sub>2</sub> for 5 s. The grids were  
464 treated for 20-40 s in pre-permeabilization buffer (PBS containing 0.1% Triton X-100, 10 mM  
465 MgCl<sub>2</sub>, 600 mM KCl and protease inhibitors) and then rinsed in PBS/2 mM MgCl<sub>2</sub> for 10 s. In  
466 the next step, the grids were treated with Benzonase (2.5 units/μl in PBS/2 mM MgCl<sub>2</sub>;  
467 Millipore, Benzonase Nuclease HC, Purity >99%) for 30 min at RT. After washing the grids  
468 with PBS/2 mM MgCl<sub>2</sub>, a 3 μl drop of 10 nm fiducial gold markers (Aurion) was applied to the  
469 grids. For vitrification the grids were manually blotted for ~3 s from the reverse side and plunge  
470 frozen in liquid ethane.

471

472 **Cryo-ET.** Tilt series acquisition was conducted using a Titan Krios transmission electron  
473 microscope (Thermo Fisher Scientific, Waltham, USA) equipped with a quantum energy filter  
474 and a K2 Summit direct electron detector (Gatan, Pleasanton, USA). The microscope was  
475 operated at 300 keV. Tilt series were collected at a nominal magnification of 42,000x and the  
476 slit width of the energy filter was set to 20 eV. Super-resolution movies were recorded within a  
477 tilt range from -60° to +60° with 2° increments using SerialEM<sup>58</sup>. The image stacks were  
478 acquired at a frame rate of 5 fps with an electron flux of ~2.5 e<sup>-</sup>/pixel/s. The tilt series were  
479 recorded with a total dosage of ~125 e<sup>-</sup>/Å<sup>2</sup> and within a nominal defocus range between -2 μm  
480 to -6 μm. The super-resolution image stacks were drift-corrected and 2x binned using  
481 MotionCorr<sup>59</sup>, resulting in a pixel size of the tilt series of 3.44 Å. For each tilt series image the  
482 defocus was measured and the contrast transfer function (CTF) was corrected by phase-

483 flipping. Then, from each tilt series a 4x binned overview tomogram was reconstructed. The  
484 CTF correction and overview tomogram reconstruction was performed using MATLAB scripts  
485 (MathWorks, Natick, USA) derived from the TOM toolbox <sup>60,61</sup>.

486

487 **Image processing.** Algorithms from EMAN2 <sup>44</sup> were employed for training a convolutional  
488 neural network capable of segmenting VIFs in the overview tomograms. The segmentations  
489 were manually checked and cleaned from obvious false positive VIF detections in Chimera <sup>62</sup>.  
490 Based on scripts derived from the ActinPolarityToolbox <sup>45</sup> (APT), two sets of segment  
491 coordinates were extracted from the segmentations. In the first set (second set) the picking  
492 distance along the VIFs was set to 165 Å (55 Å), resulting in 390,297 (1,148,072) segment  
493 coordinates. Next, based on the segment coordinates two stacks of subtomograms were  
494 reconstructed from the CTF corrected tilt series with the TOM toolbox. The dimensions of the  
495 subtomograms were 65 x 65 x 65 nm<sup>2</sup> and 38 x 38 x 38 nm<sup>2</sup>, respectively, and the pixel size  
496 was 3.44 Å. Subsequently, APT scripts were applied to project the subtomograms, using a  
497 projection thickness of 331 Å for the first set and 220 Å for the second set. The size of the  
498 subtomogram projections derived from the first and second coordinate sets were 65 x 65 nm<sup>2</sup>  
499 and 38 x 38 nm<sup>2</sup>, respectively.

500 In the following, VIF segments were subjected to extensive, unsupervised 2D classifications in  
501 RELION <sup>46,63</sup> (Supplementary Fig. 1c, Supplementary Fig. 2a, and Supplementary Fig. 5) in  
502 order to sort out false positive and low signal-to-noise ratio segments. As a consequence, the  
503 first particle set (second particle set) was concentrated to 133,780 (615,106) VIF segments.  
504 The Markov chain analysis (Supplementary Fig. 2d) was based on 2D classification of the first  
505 particle set into 50 classes (Supplementary Fig. 2a). Employing APT scripts, the segments  
506 were connected to filaments and the sequences of the class averages along the filaments were  
507 analysed. For this purpose, a 50x50 transition matrix (T)<sub>ij</sub> was calculated, with each matrix  
508 element ij indicating the number of class average transitions from class average i to class  
509 average j along the filaments. Next, (T)<sub>ij</sub> was analysed with the MATLAB function *dtmc*.

510 The assembly of VIFs (Fig. 2a and Fig. 2g) was based on the 2D classification of the second  
511 particle set into 100 classes (Supplementary Fig. 5). For this purpose, the transformations  
512 calculated for each segment (namely their in-plane rotation angle  $\psi$  and their xy-translation)  
513 were inverted and applied to the respective class averages, so that the inversely transformed  
514 class averages match position and orientation of the initial segments in the image frame of the  
515 tomograms<sup>53</sup>. As a result of this operation the VIFs are represented by the class averages,  
516 which drastically improves their signal-to-noise ratio compared to the raw filaments.  
517 Subsequently, the assembled VIFs were unbent based on a MATLAB algorithm derived from  
518 the ImageJ<sup>64</sup> straighten function<sup>1,54</sup>.

519 The autocorrelation profiles (Supplementary Fig. 3b, Fig. 2c) were calculated with the TOM  
520 toolbox function *tom\_corr*, either calculating autocorrelation functions of class averages or  
521 assembled VIFs. The respective autocorrelation functions were averaged and displayed as  
522 profile plots. The power spectra (Fig. 1e, Fig. 2d) were calculated with the TOM toolbox  
523 function *tom\_ps*, either calculating an averaged power spectrum from a series of class  
524 averages or a series of assembled VIFs. In the second case the assembled filaments were  
525 boxed to an equal length of 1024 pixel before calculating the averaged power spectrum.

526 The helical parameter searches (Supplementary Fig. 4d, Supplementary Figs. 6d&e) utilized  
527 a MATLAB script that created and executed RELION commands, and after completion  
528 analysed the results. Here, the RELION function *relion\_refine* was used extensively in  
529 combination with the options *-auto\_refine* (to ensure gold-standard resolution measurements  
530<sup>49</sup>) and *-helix* (to perform helical reconstruction<sup>48</sup>). In order to scan a certain helical parameter  
531 interval, the options *-helical\_rise\_initial* and *-helical\_twist\_initial* were varied accordingly  
532 between the Refine3D jobs. Subsequently, the gold-standard resolution values were plotted  
533 and the helical parameter combination with the optimal resolution value was identified.

534 In order to create modelled power spectra of VIFs, the vimentin tetramer model, as obtained  
535 by molecular dynamics simulation<sup>29,40</sup>, was fitted in the tube wall of one of the rotationally  
536 symmetrized class averages in Chimera (Supplementary Fig. 4a). Subsequently, defined  
537 helical parameter combinations were applied with the Chimera *sym* command to the fitted

538 tetramer, thereby creating symmetry related tetramer copies. Next, the tetramers were  
539 converted into a 10 Å electron density map with the Chimera *molmap* command and the  
540 modelled electron density maps were elongated to 1024 pixel long filament models by using  
541 the RELION command *relion\_helix\_toolbox*. These structures were projected and power  
542 spectra were calculated. Based on the cross-correlation coefficient (TOM toolbox function  
543 *tom\_ccc*), these modelled power spectra were compared with the experimentally measured  
544 power spectrum of VIFs (Fig. 2d). Subsequently, the cross-correlation values were plotted and  
545 the helical parameter combination with maximized similarity was identified (Fig. 2e).  
546 Similarly, the VIF models (Fig. 4, Supplementary Fig. 9) were generated in Chimera. For this  
547 purpose, the vimentin tetramer model was fitted in the tube wall of the VIF structure (Fig. 3)  
548 and the measured helical symmetry ( $h_f=37.1$  Å,  $t_f=71.9^\circ$ ) was applied with the Chimera *sym*  
549 command to the fitted tetramer, thereby creating a defined number of symmetry related  
550 tetramer copies (10 copies in Fig. 4d and 5, 10, and 30 copies in Supplementary Fig. 9).  
551 Subsequently, the tetramers were converted into an 8 Å electron density map with the Chimera  
552 *molmap* command and the modelled electron density map was docked into the VIF structure  
553 with the Chimera *fitmap* command (Supplementary Fig. 8).  
554 The VIF helical lattice visualizations (Supplementary Figs. 10a&c) were created by  
555 transforming the modelled electron density map from cartesian to cylindrical coordinates with  
556 the TOM toolbox function *tom\_cart2cyl*. This transformation was conducted for the densities  
557 of each of the vimentin protein domains individually. The transformed densities were projected  
558 and the resulting images were coloured and combined in one image.

559

560 **Visualization.** All isosurface representations and the visualization of the VIF model were  
561 rendered with Chimera.

562

563 **Data availability.** The algorithms developed in this work are available from the corresponding  
564 author upon request. The VIF structure is deposited in the Electron Microscopy Data Bank  
565 under the accession code EMD-13084.



566 **SUPPLEMENTARY MOVIES**

567

568 **Supplementary Movie 1. Cryo-tomogram of a detergent treated MEF.** The movie shows  
569 successive slices of a representative cryo-tomogram of detergent treated MEFs. The field of  
570 view of the tomogram has a size of 1.41 x 1.41  $\mu\text{m}^2$ .

571

572 **Supplementary Movie 2. VIF model docked into VIF structure.** The movie shows the  
573 docking of the VIF model in the VIF structure (grey transparent density). The vimentin domains  
574 are color-coded according to the color key. The length of the filament shown is 60 nm.

575

576 **Supplementary Movie 3. VIF model rotating around the filament axis.** The vimentin  
577 domains of the rotating VIF model are color-coded according to the color key. The length of  
578 the modelled filament shown is 60 nm.

579

580

581

582 **SUPPLEMENTARY FIGURES**

583

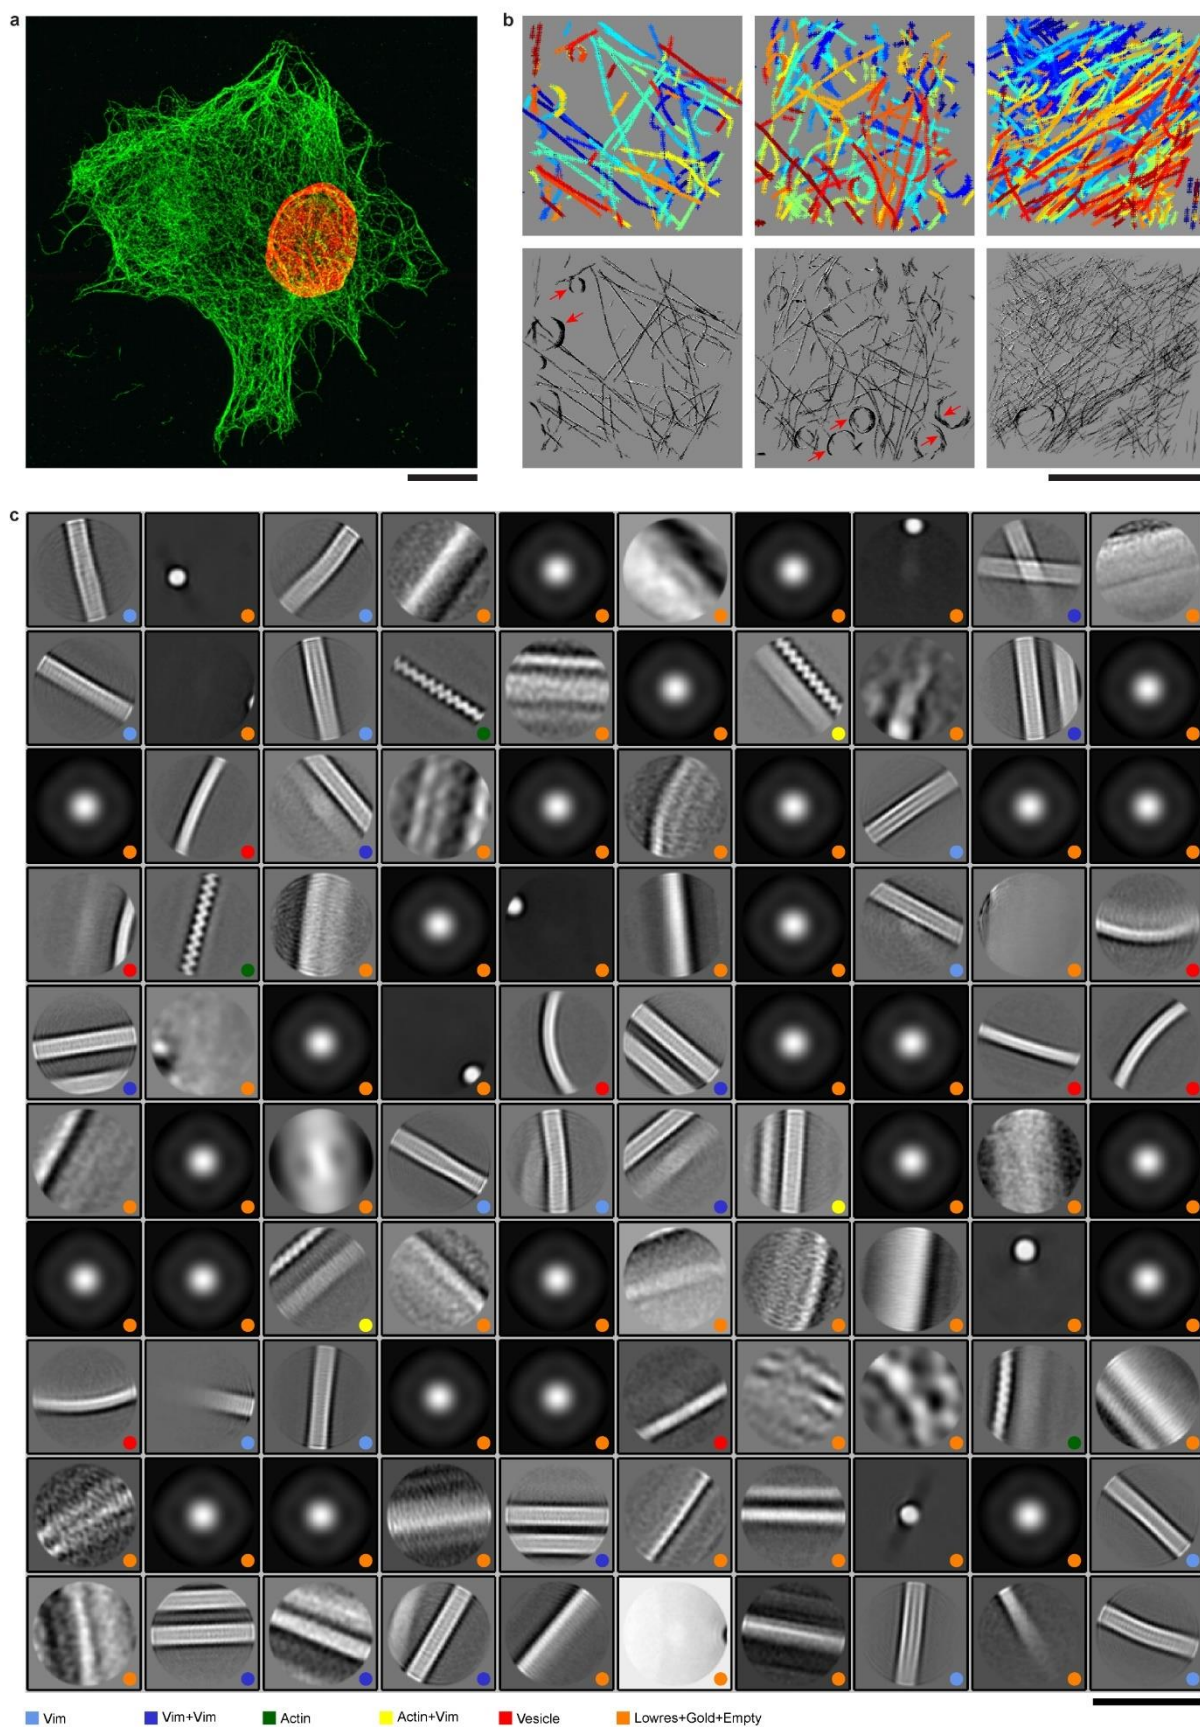

584

585 **Supplementary Figure 1. Deep classification of VIFs.** (a) Maximum projection of a 3D-SIM  
586 image of a detergent treated MEF. The VIF network remains intact following the  
587 permeabilization procedure, fixation and staining with vimentin antibody (green). The cell  
588 nucleus is stained in red using lamin antibody. Scale bar 10  $\mu\text{m}$ . (b) Three examples for picking  
589 VIFs with a convolutional neural network (top row). Because the filament detection is  
590 performed in 3D cryo-tomograms, VIFs from densely packed regions can be analyzed as well.  
591 Detected VIFs are shown in the lower panel. The convolutional neural network was over-  
592 picking membrane structures as VIFs (red arrows). Scale bar 1  $\mu\text{m}$ . (c) Initial 2D classification  
593 of 390,297 projected vimentin segments ( $65 \times 65 \text{ nm}^2$ , picking distance 165  $\text{\AA}$ , projection  
594 thickness 331  $\text{\AA}$ ). The following patterns occur frequently in the class averages: Single VIFs  
595 (classes marked with light blue dots), two VIFs running parallel or crossing on top of each other  
596 (blue dots), single actin filaments (green dots), one VIF and one actin filament running parallel  
597 (yellow dots), and vesicle membranes (red dots). Other categories (very low-resolution class  
598 averages, gold markers or empty classes) are labelled with orange dots. Only particles from  
599 single VIF classes (light blue dots) were further analyzed. Scale bar 65 nm.

600

601

602

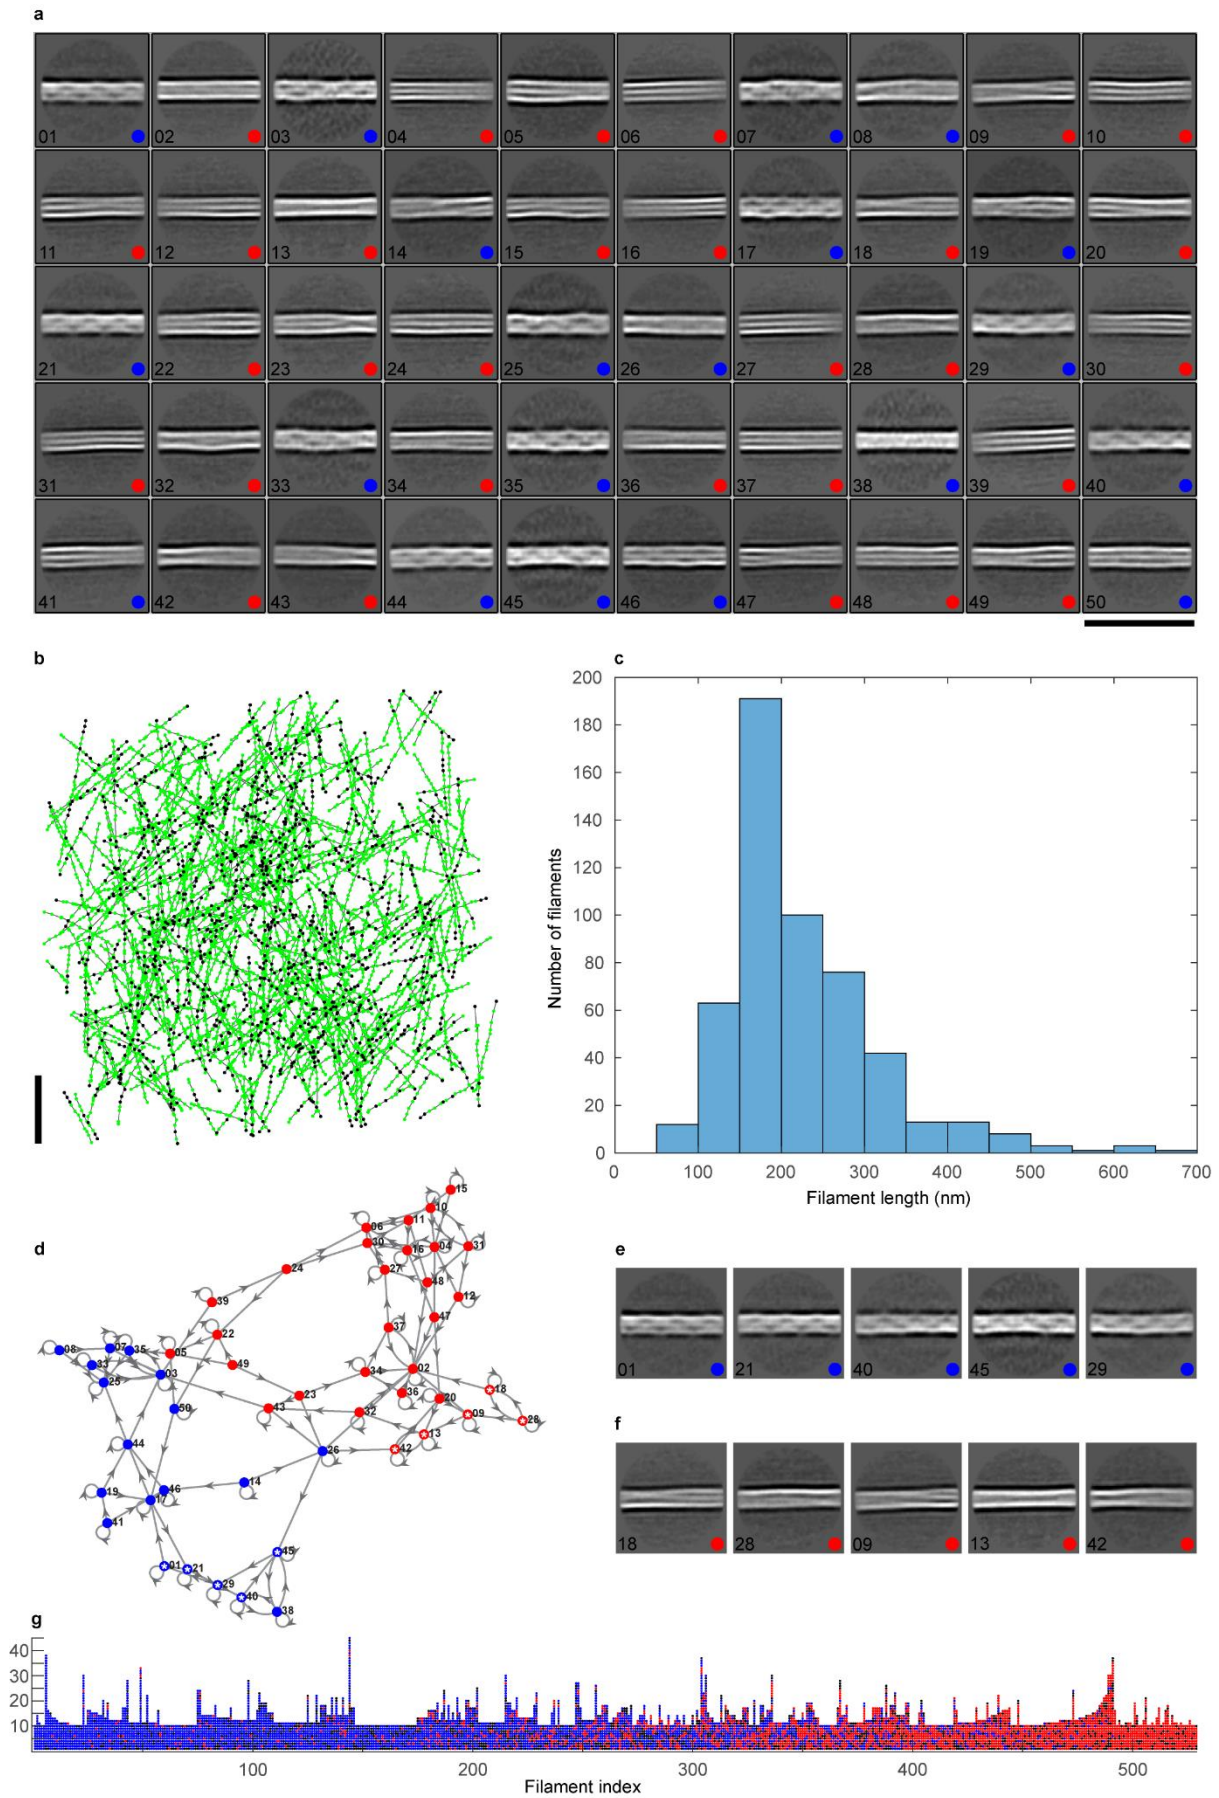

604 **Supplementary Figure 2. Extraction and pattern analysis of VIFs.** (a) Class averages of  
605 VIFs split into two categories: The first group (VIF state-1) is characterized by similar helical  
606 patterns (class averages marked with blue dots). The second group (VIF state-2) is  
607 characterized by similar rope like patterns (class averages marked with red dots). The 2D  
608 classification is based on 133,780 segments. Scale bar 65 nm. (b) VIFs (in total 529 with a  
609 minimum length of 10 segments) were extracted based on the 2D classification shown in (a).  
610 Green dots represent the 3D coordinates of VIF segments, and segments plotted as black dots  
611 were sorted out during 2D classifications. Only filaments with a minimum proportion of 0.7  
612 between processed segments (green dots) and total number of segments per filament were  
613 accepted. The orientations and positions of the filaments in the cryo-tomograms were  
614 randomly distributed. The z-coordinates of the segments were located within  $\pm 90$  nm around  
615 the central xy-plane of the cryo-tomograms. (c) Length distribution of the extracted filaments.  
616 (d) The sequences of class averages were analyzed along the VIFs with a Markov chain  
617 analysis. State-1 class averages are closely connected (blue dots), as are state-2 class  
618 averages (red dots) as well. A sequence of state-1 averages (blue dots marked with white  
619 asterisks) is shown in (e), and a sequence of state-2 averages (red dots marked with white  
620 asterisks) is shown in (f). In (g) the extracted VIFs are plotted as columns, each segment is  
621 represented by a dot, and their colors indicate the structural pattern of the segments. Blue and  
622 red dots represent state-1 and state-2 structural patterns, respectively, and black dots are  
623 segments sorted out during 2D classifications. The VIFs are sorted from left to right based on  
624 their fraction of state-1 segments. VIFs which predominantly display state-1 or state-2 patterns  
625 can be observed, as well as filaments which are transitioning between these structural states.  
626  
627  
628

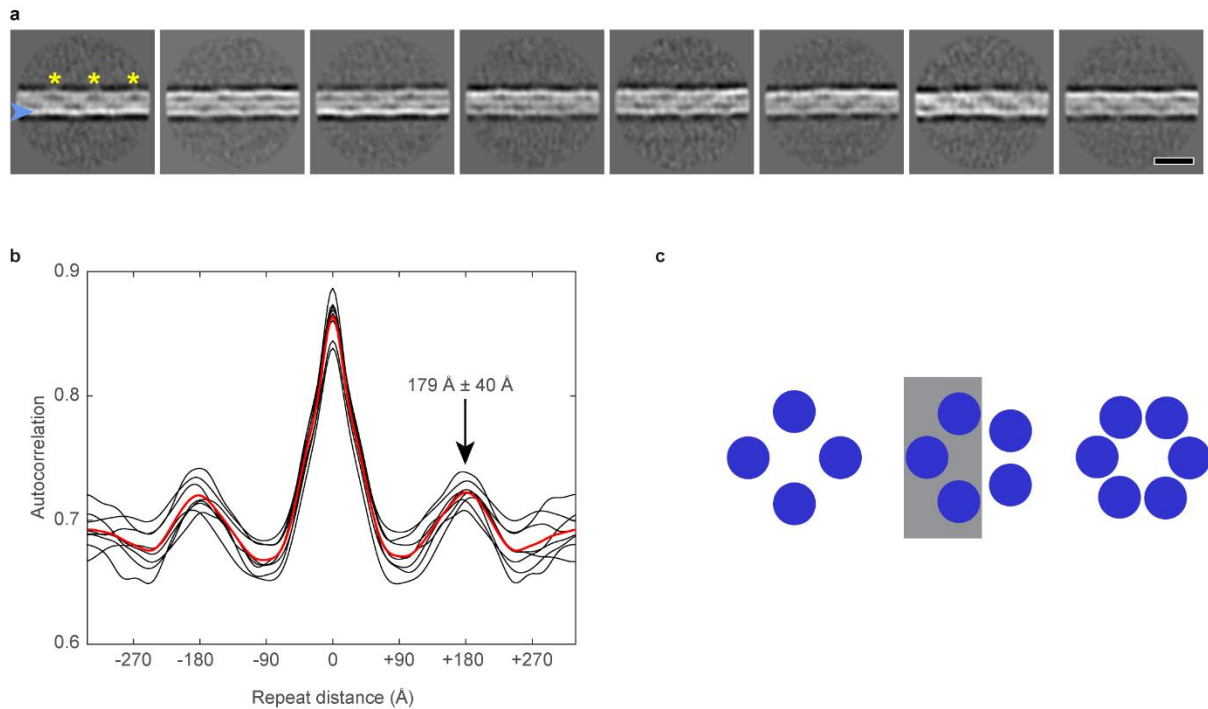

629

630 **Supplementary Figure 3. Repeat distance of VIF state-1 class averages.** (a) Class

631 averages showing wall asymmetry in projection (blue arrowhead) and repeating features like

632 elongated, parallel low-density regions together with a local increase of boundary curvature

633 and outward protrusions (yellow asterisks). Scale bar 180 Å. (b) The correlation of each class

634 average with itself was calculated and the corresponding autocorrelation profiles along the

635 x-axis were plotted (black lines). The red line is the averaged autocorrelation profile over all

636 class averages. The pattern in the averages repeats at a distance of 179 Å ± 40 Å. (c) Model

637 to explain the boundary asymmetry in the class averages (blue arrowhead in (a)). If the VIFs

638 are assembled from five sub-filaments, one side of the VIF would appear brighter in projection

639 (grey rectangle). However, if they are assembled from four or six sub-filaments the VIF

640 boundaries would have similar densities in projection.

641

642

643

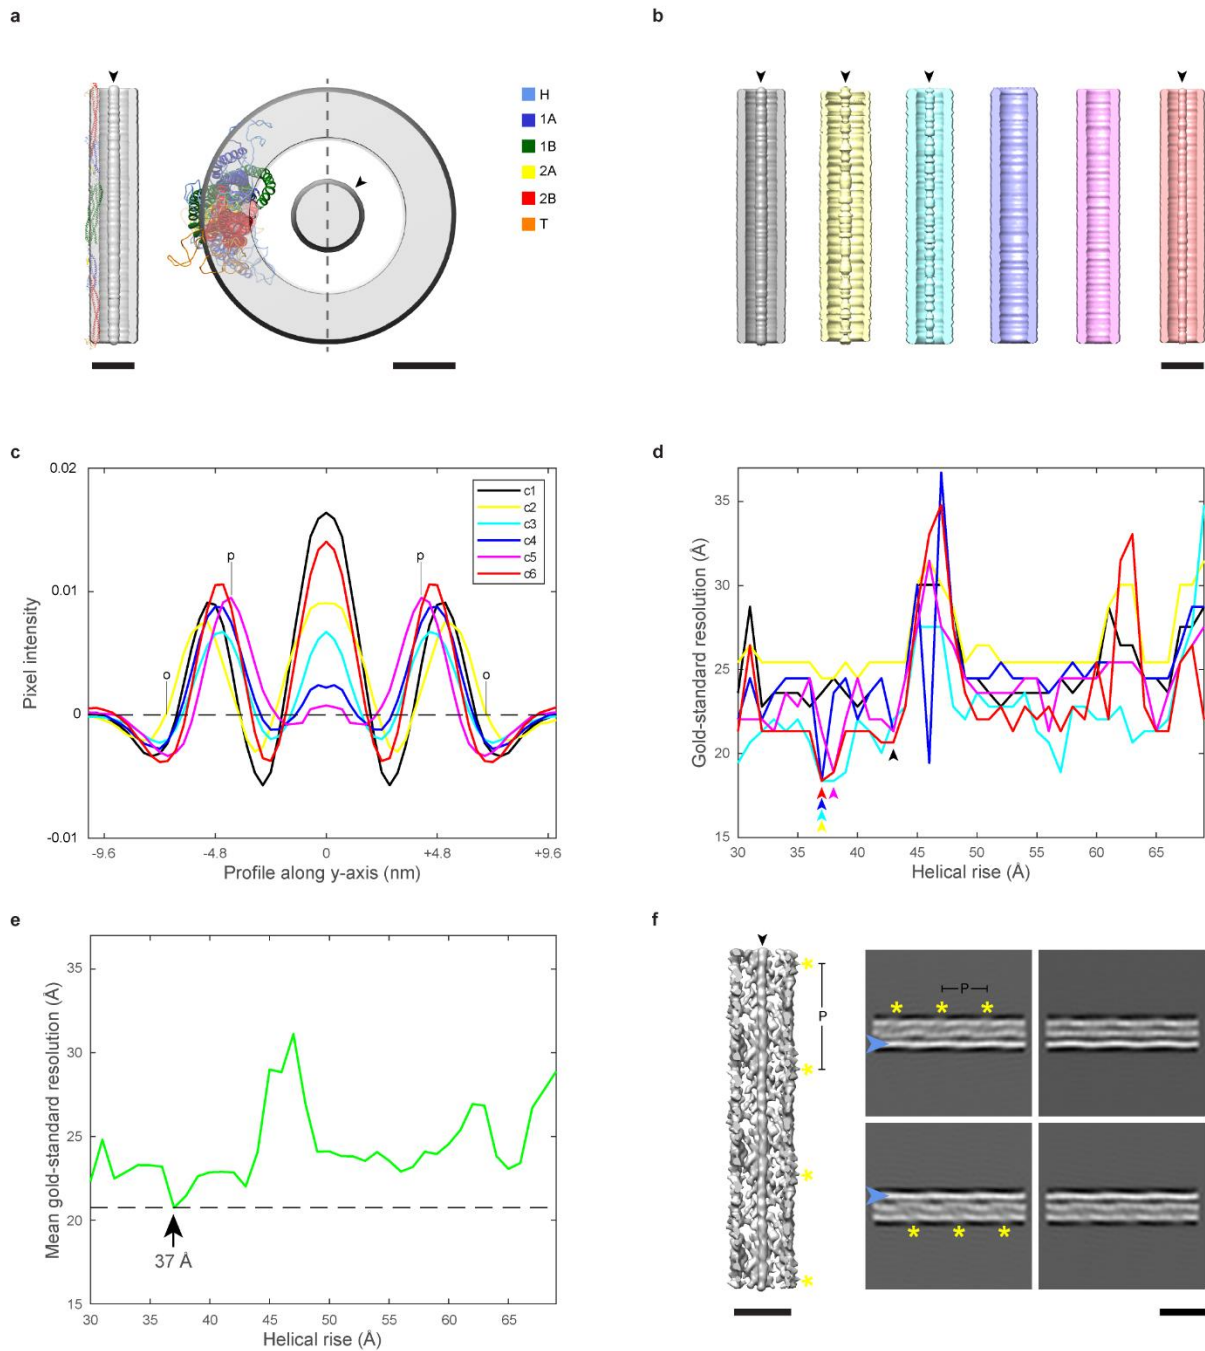

644

645 **Supplementary Figure 4. Helical parameter search.** (a) VIF segments (133,780 particles of  
 646 size 65 x 65 nm<sup>2</sup>) were classified in six classes and the resulting 3D averages were rotationally  
 647 symmetrized along their central axis. One of the tubes is shown in a cut-open view on the left  
 648 and shown from the top on the right. The black arrowheads indicate the luminal density. The  
 649 vimentin tetramer model, as obtained by molecular dynamics simulation<sup>29</sup>, has a length of  
 650 ~61.3 nm and an average diameter in cross-section of ~3.6 nm. The tetramer model was fitted  
 651 into the tube wall of the class average. Its tube wall thickness and curvature reflect the diameter

652 and flexion of the tetramer model. The different domains of the tetramer are colored according  
653 to the color key. The vertical dashed line (y-axis) in the top view marks the path along which  
654 the profiles plotted in (c) were extracted. Left scale bar 10 nm and right scale bar 3 nm. (b) The  
655 symmetrized filament tubes are shown as cut-open views. The classification splits the particle  
656 set according to filament diameter and luminal density. Prominent luminal densities are marked  
657 with black arrowheads. Scale bar 10 nm. (c) Profile plots along the y-axis of the symmetrized  
658 class averages, referred to as c1-c6 in the legend. The average distance between the tube  
659 wall centers (p-p-distance, as exemplified for c5) is  $9.4 \text{ nm} \pm 0.8 \text{ nm}$  and the mean outer tube  
660 diameter (o-o-distance, as exemplified for c2) is  $12.7 \text{ nm} \pm 0.7 \text{ nm}$ . The average tube wall  
661 thickness is  $3.3 \text{ nm} \pm 0.4 \text{ nm}$ . (d) For each of the particle subsets, which are corresponding to  
662 the six symmetrized 3D class averages, 40 unbiased, gold-standard 3D refinements in  
663 RELION<sup>63</sup> were calculated with constant pitch of 186 Å, but varying the helical rise between  
664 30 Å to 69 Å in 1 Å increments. The gold-standard resolution of the 3D refinements is plotted  
665 as a function of the helical rise. The global resolution optimum for the different particle subsets  
666 is indicated with arrowheads. (e) The green curve shows the average of the six resolution  
667 curves displayed in (d). The global resolution optimum is located at a helical rise of 37 Å.  
668 (f) The VIF structure shown here is the result of a helical 3D classification assuming a helical  
669 pitch of 186 Å and a helical rise of 37 Å. This class harbors a luminal density, which is marked  
670 with a black arrowhead. The filament wall exhibits outward protrusions, indicated with yellow  
671 asterisks, and their distance is equal to the helical pitch. Scale bar 10 nm. In addition, four  
672 reprojections of the filament structure are shown. The reprojections reproduce the features  
673 observed in the experimental class averages, that are the asymmetry of the VIF boundaries in  
674 projection (blue arrowheads) and parallel, low-density regions together with a local increase of  
675 boundary curvature and outward protrusions (yellow asterisks). Scale bar 180 Å.

676

677

678



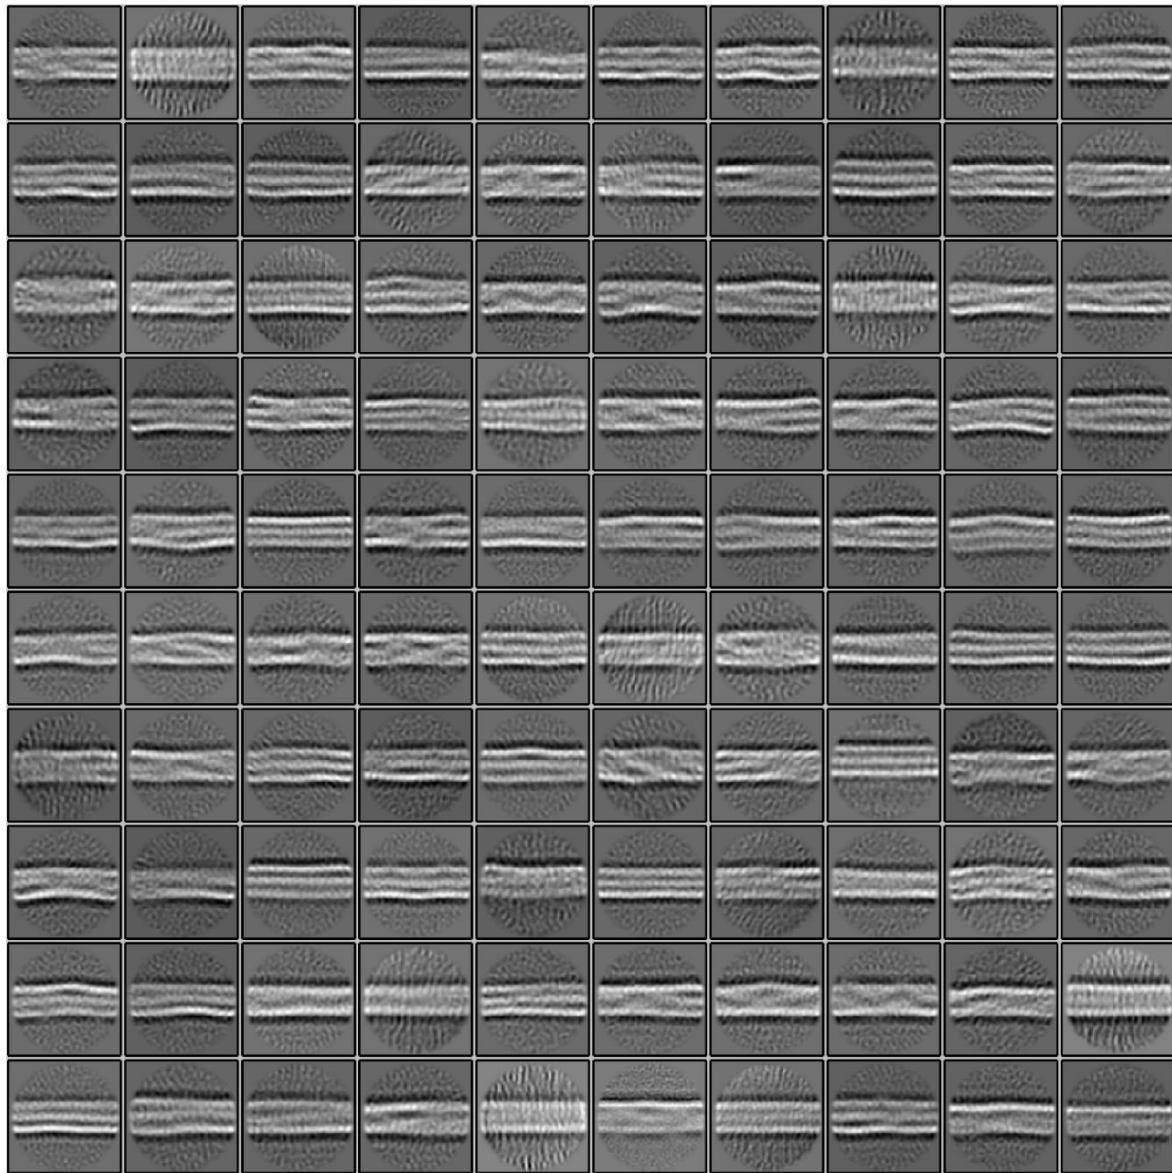

679

680 **Supplementary Figure 5. Extended 2D classification of vimentin segments.** Vimentin  
681 segments (615,106 particles with a size of 38 x 38 nm<sup>2</sup>) were split by 2D classification in 100  
682 classes. The picking distance between the segments was set to 55 Å and the projection  
683 thickness to 220 Å. The displayed class averages were used for subsequent filament  
684 assembly. Scale bar 35 nm.

685

686

687

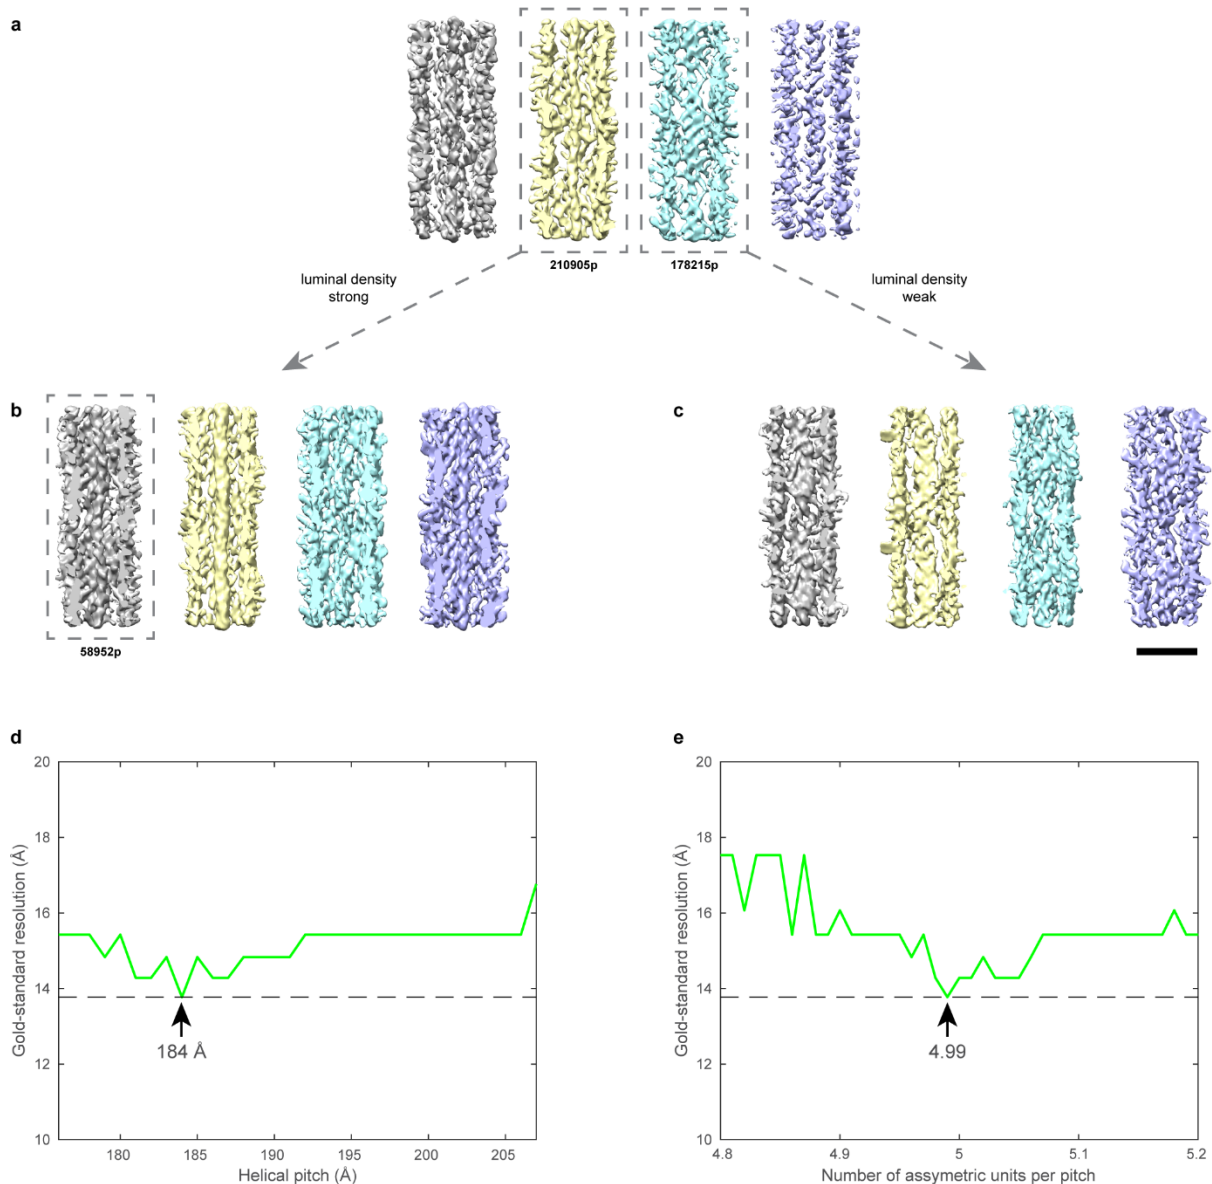

688

689 **Supplementary Figure 6. Helical 3D classification of VIF segments.** (a) VIF segments  
690 (615,106 particles with a size of 38 x 38 nm<sup>2</sup>) were grouped by helical 3D classification in four  
691 classes (c1-c4). A helical symmetry with a helical pitch of 186 Å and a helical rise of 37 Å were  
692 assumed. The 3D class averages differ with respect to tube diameter and luminal density.  
693 Classes c1 and c2 show pronounced luminal densities, whereas c3 and c4 show weak or no  
694 luminal densities. This 3D classification defines which of the segments will be mapped as VIF  
695 state-1 (c1 and c2, in total 324,386 particles) or VIF state-2 (c3 and c4, in total 290,720  
696 particles) on the assembled filaments (Fig. 2g). Classes c2 and c3 were further classified. The  
697 results are shown in (b) and (c), respectively. Scale bar 10 nm. (d) Those segments assigned  
698 to c1 in (b) (58,952 particles), were further analyzed by applying two more exhaustive helical

699 parameter searches. The result of the first helical search is shown in **(d)**. Here the number of  
700 asymmetric subunits in one pitch was kept constant at  $n=5.0$ , but the helical pitch was varied  
701 between 176 Å to 207 Å in 1 Å increments. This effectively translates into varying the helical  
702 rise  $h_r$  and keeping the helical twist  $h_t$  constant at  $72^\circ$ . The green curve shows the gold-  
703 standard resolution values<sup>49</sup>, recorded with 3D Refine jobs in RELION<sup>48</sup>. The global resolution  
704 optimum was found at a helical pitch of 184 Å ( $\Rightarrow h_r=36.8$  Å,  $h_t=72^\circ$ ). The result of the second  
705 helical search is shown in **(e)**. Here we kept the helical pitch constant at 185.6 Å and varied  $n$   
706 between 4.8 and 5.2. The optimal  $n$  was found at 4.99, therefore  $h_r=37.2$  Å and  $h_t=72.2^\circ$ . These  
707 helical parameters were used in the final 3D refinement as starting values for a local helical  
708 symmetry search as implemented in RELION.

709

710

711

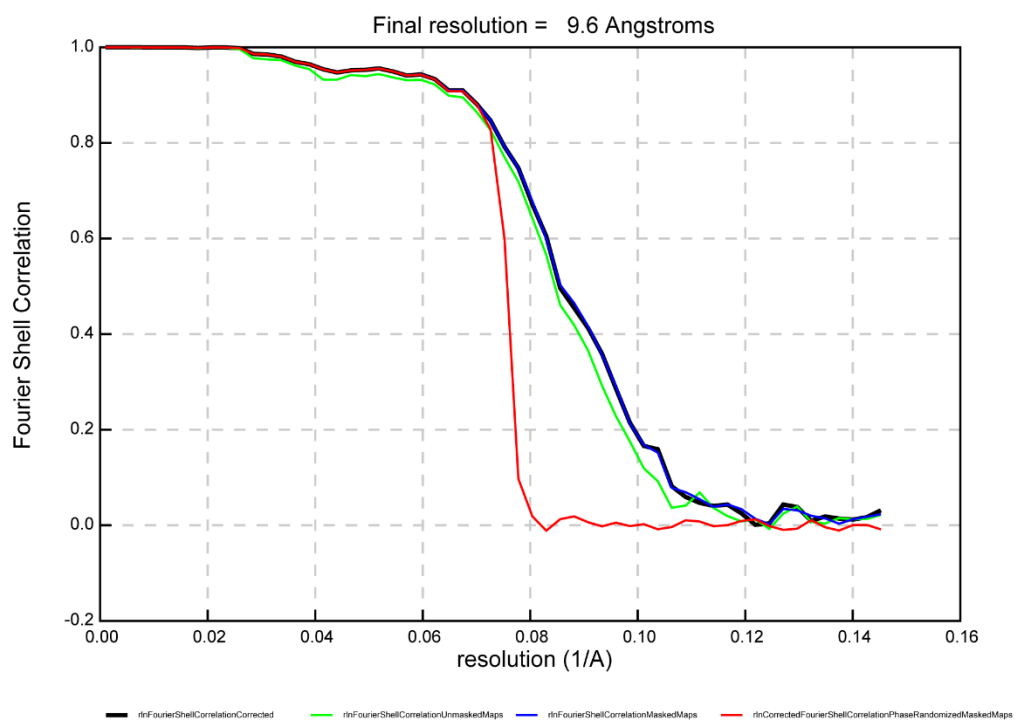

712

713 **Supplementary Figure 7. Resolution of the resulting VIF state-1 structure.** The structure

714 reached a resolution of 9.6 Å.

715

716

717

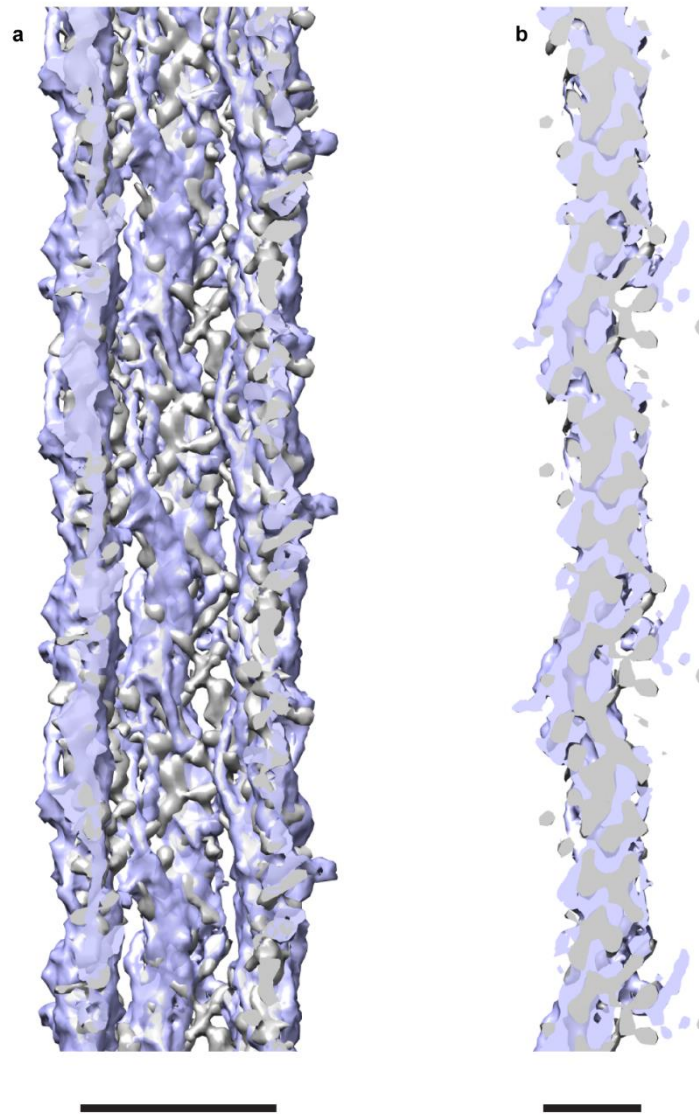

718

719 **Supplementary Figure 8. Docking of the VIF model.** (a) The VIF model was converted into  
720 an electron density map (blue structure) and docked into the VIF structure (grey density). The  
721 correlation coefficient between the two structures is 0.81. Scale bar 10 nm. (b) The view  
722 sections through one of the protofibrils. The overall shape of the VIF model (blue density)  
723 matches the overall shape of the VIF structure (grey density). Scale bar 5 nm.

724

725

726

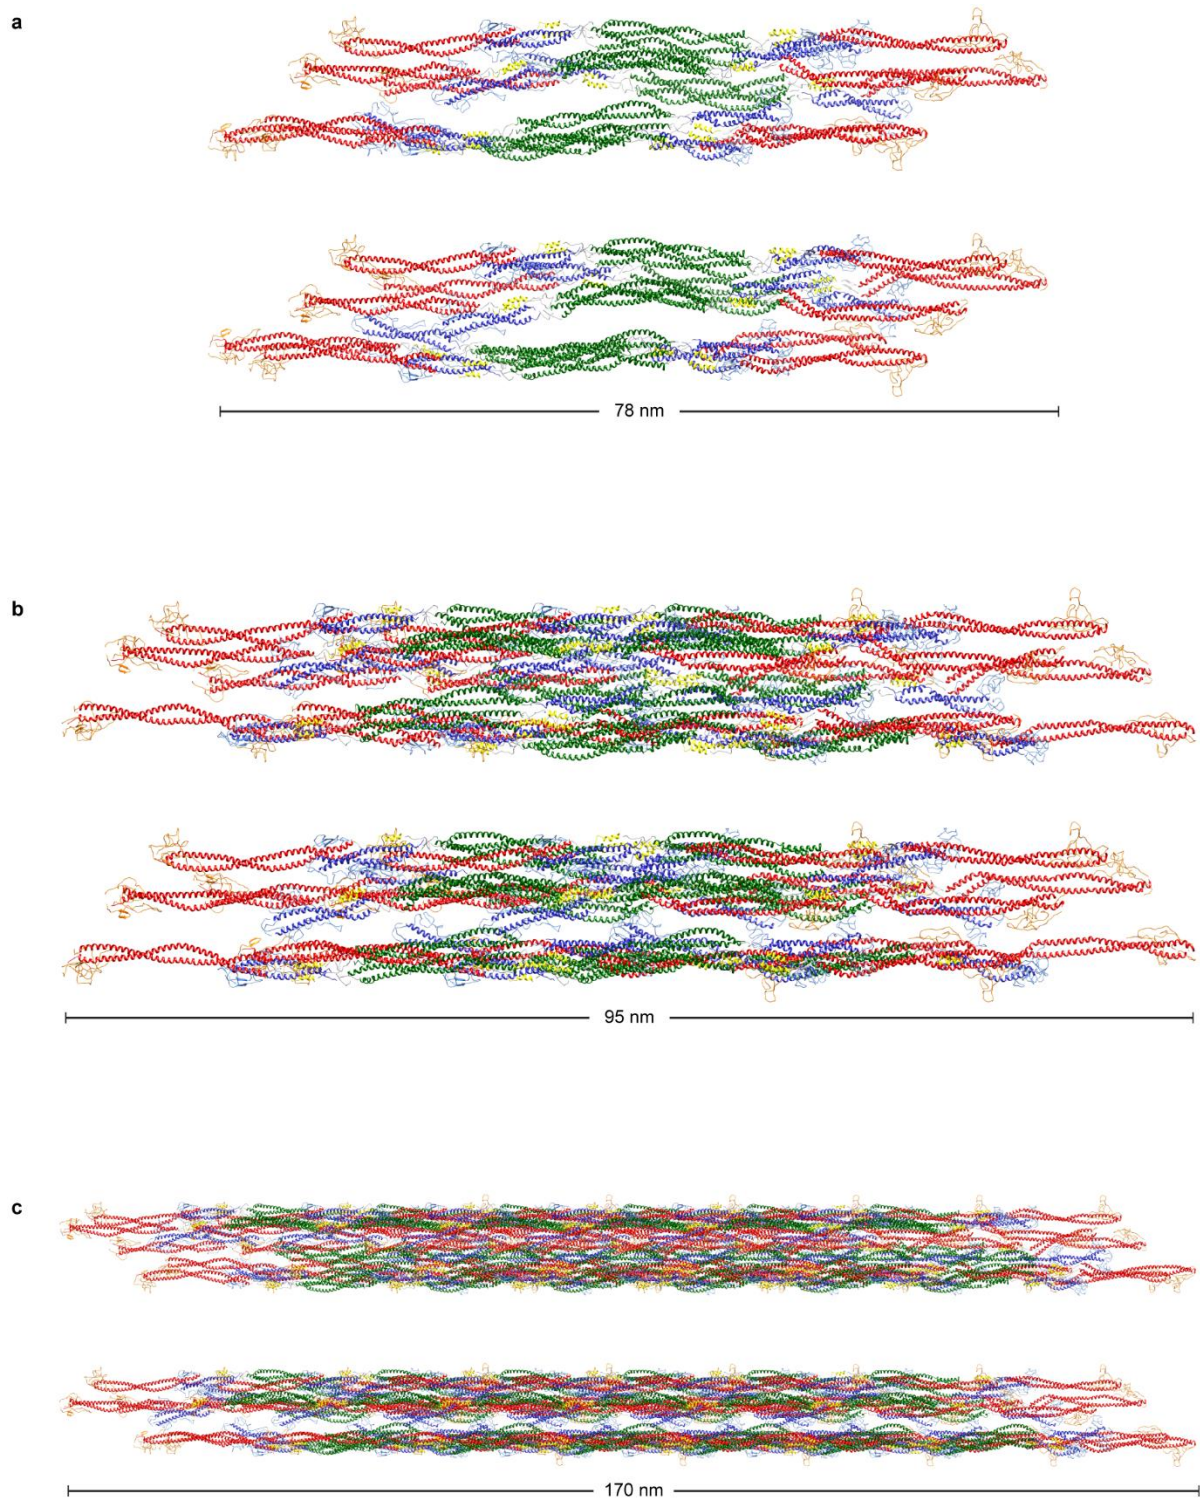

727

728 **Supplementary Figure 9. Gallery of VIF models.** Three VIF models were constructed based

729 on the measured helical symmetry and the known structure of the vimentin tetramer<sup>29</sup>. The

730 models differ in the number of tetramers: **(a)**, 5 tetramers, **(b)**, 10 tetramers, and **(c)**,

731 30 tetramers, respectively. Each model is depicted in two views. The second view is rotated

732 18° around the filament axis compared to the first view.

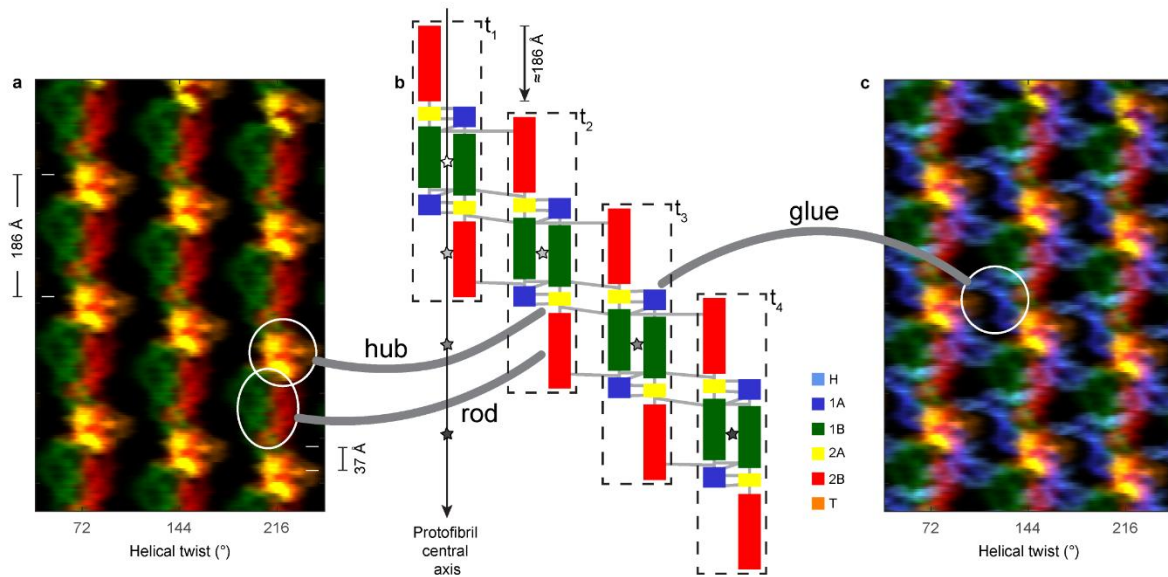

733

734 **Supplementary Figure 10. Molecular architecture of VIFs.** (a) Illustration of the helical

735 lattice of in-situ polymerized VIFs (three of five protofibrils<sup>32</sup> are depicted). The angular spacing

736 between the protofibrils is  $\sim 72^\circ$  (helical twist). Identical features along the same protofibril

737 repeat every  $\sim 186 \text{ \AA}$  (helical pitch). Identical features between neighboring protofibrils are

738 translated by  $\sim 37 \text{ \AA}$  (helical rise). The 1A and H domains are omitted in this image, so there

739 are no connections visible between the protofibrils. (b) Illustration of the domain structure of a

740 protofibril. Four  $A_{11}$  vimentin tetramers<sup>29,55</sup> are outlined with dashed rectangles ( $t_1, \dots, t_4$ ) and

741 their centers of mass are indicated with asterisks. A protofibril is constructed by successive

742 translations of tetramers in steps of the helical pitch. Therefore, the mass centers of the

743 tetramers are aligned along the protofibril central axis with a distance of the helical pitch length.

744 In the illustration, we additionally added a progressive translation of the tetramers from left to

745 right, in order to have an unobstructed view on the individual tetramers. Since the lateral

746 stagger between two antiparallel dimers in the  $A_{11}$  vimentin tetramer is similar to the measured

747 helical pitch, the tetramer with index  $i+1$  along a protofibril creates an  $A_{12}$  binding interface<sup>55</sup>

748 with the tetramer with index  $i$ . Therefore, our VIF model agrees with the previously determined

749 cross-links<sup>55</sup>, which are represented by the domain connecting lines. (c) The 1A and H

750 domains protrude into the space between the protofibrils to form the glue regions.

751

752 **REFERENCES**

- 753 1 Steinert, P. M., Steven, A. C. & Roop, D. R. The molecular biology of intermediate  
754 filaments. *Cell* **42**, 411-420, doi:10.1016/0092-8674(85)90098-4 (1985).
- 755 2 Eldirany, S. A., Lomakin, I. B., Ho, M. & Bunick, C. G. Recent insight into intermediate  
756 filament structure. *Current Opinion in Cell Biology* **68**, 132-143,  
757 doi:10.1016/j.ceb.2020.10.001 (2021).
- 758 3 Tsuruta, D. & Jones, J. C. The vimentin cytoskeleton regulates focal contact size and  
759 adhesion of endothelial cells subjected to shear stress. *J Cell Sci* **116**, 4977-4984,  
760 doi:10.1242/jcs.00823 (2003).
- 761 4 Helfand, B. T. *et al.* Vimentin organization modulates the formation of lamellipodia.  
762 *Mol Biol Cell* **22**, 1274-1289, doi:10.1091/mbc.E10-08-0699 (2011).
- 763 5 Jiu, Y. *et al.* Vimentin intermediate filaments control actin stress fiber assembly  
764 through GEF-H1 and RhoA. *J Cell Sci* **130**, 892-902, doi:10.1242/jcs.196881  
765 (2017).
- 766 6 Schoumacher, M., Goldman, R. D., Louvard, D. & Vignjevic, D. M. Actin,  
767 microtubules, and vimentin intermediate filaments cooperate for elongation of  
768 invadopodia. *J Cell Biol* **189**, 541-556, doi:10.1083/jcb.200909113 (2010).
- 769 7 Gan, Z. *et al.* Vimentin Intermediate Filaments Template Microtubule Networks to  
770 Enhance Persistence in Cell Polarity and Directed Migration. *Cell Syst* **3**, 252-263  
771 e258, doi:10.1016/j.cels.2016.08.007 (2016).
- 772 8 Shabbir, S. H., Cleland, M. M., Goldman, R. D. & Mrksich, M. Geometric control of  
773 vimentin intermediate filaments. *Biomaterials* **35**, 1359-1366,  
774 doi:10.1016/j.biomaterials.2013.10.008 (2014).
- 775 9 Yu, Y. T. C. *et al.* Surface vimentin is critical for the cell entry of SARS-CoV. *J Biomed*  
776 *Sci* **23**, doi:ARTN 14  
777 10.1186/s12929-016-0234-7 (2016).
- 778 10 Suprewicz, L. *et al.* Vimentin binds to SARS-CoV-2 spike protein and antibodies  
779 targeting extracellular vimentin block in vitro uptake of SARS-CoV-2 virus-like  
780 particles. *bioRxiv*, doi:10.1101/2021.01.08.425793 (2021).
- 781 11 Mendez, M. G., Kojima, S. & Goldman, R. D. Vimentin induces changes in cell shape,  
782 motility, and adhesion during the epithelial to mesenchymal transition. *FASEB J* **24**,  
783 1838-1851, doi:10.1096/fj.09-151639 (2010).
- 784 12 Kidd, M. E., Shumaker, D. K. & Ridge, K. M. The role of vimentin intermediate  
785 filaments in the progression of lung cancer. *Am J Respir Cell Mol Biol* **50**, 1-6,  
786 doi:10.1165/rcmb.2013-0314TR (2014).
- 787 13 Satelli, A. & Li, S. L. Vimentin in cancer and its potential as a molecular target for  
788 cancer therapy. *Cell Mol Life Sci* **68**, 3033-3046, doi:10.1007/s00018-011-0735-1  
789 (2011).
- 790 14 Danielsson, F., Peterson, M. K., Caldeira Araujo, H., Lautenschlager, F. & Gad, A. K.  
791 B. Vimentin Diversity in Health and Disease. *Cells* **7**, doi:10.3390/cells7100147  
792 (2018).
- 793 15 Muller, M. *et al.* Dominant cataract formation in association with a vimentin  
794 assembly disrupting mutation. *Hum Mol Genet* **18**, 1052-1057,  
795 doi:10.1093/hmg/ddn440 (2009).
- 796 16 Henderson, P., Wilson, D. C., Satsangi, J. & Stevens, C. A role for vimentin in Crohn  
797 disease. *Autophagy* **8**, 1695-1696, doi:10.4161/auto.21690 (2012).
- 798 17 Fernandez-Ortega, C. *et al.* Identification of Vimentin as a Potential Therapeutic  
799 Target against HIV Infection. *Viruses-Basel* **8**, doi:ARTN 98



- 800 10.3390/v8060098 (2016).
- 801 18 Goldman, R. D., Khuon, S., Chou, Y. H., Opal, P. & Steinert, P. M. The function of  
802 intermediate filaments in cell shape and cytoskeletal integrity. *J Cell Biol* **134**, 971-  
803 983, doi:10.1083/jcb.134.4.971 (1996).
- 804 19 Lowery, J., Kuczmarski, E. R., Herrmann, H. & Goldman, R. D. Intermediate  
805 Filaments Play a Pivotal Role in Regulating Cell Architecture and Function. *J Biol*  
806 *Chem* **290**, 17145-17153, doi:10.1074/jbc.R115.640359 (2015).
- 807 20 Janmey, P. A., Euteneuer, U., Traub, P. & Schliwa, M. Viscoelastic properties of  
808 vimentin compared with other filamentous biopolymer networks. *J Cell Biol* **113**,  
809 155-160, doi:10.1083/jcb.113.1.155 (1991).
- 810 21 Vikstrom, K. L., Lim, S. S., Goldman, R. D. & Borisy, G. G. Steady state dynamics of  
811 intermediate filament networks. *J Cell Biol* **118**, 121-129,  
812 doi:10.1083/jcb.118.1.121 (1992).
- 813 22 Noding, B., Herrmann, H. & Koster, S. Direct observation of subunit exchange along  
814 mature vimentin intermediate filaments. *Biophys J* **107**, 2923-2931,  
815 doi:10.1016/j.bpj.2014.09.050 (2014).
- 816 23 Kraxner, J. *et al.* Post-translational modifications soften vimentin intermediate  
817 filaments. *Nanoscale* **13**, 380-387, doi:10.1039/d0nr07322a (2021).
- 818 24 Snider, N. T. & Omary, M. B. Post-translational modifications of intermediate  
819 filament proteins: mechanisms and functions. *Nat Rev Mol Cell Biol* **15**, 163-177,  
820 doi:10.1038/nrm3753 (2014).
- 821 25 Monico, A., Duarte, S., Pajares, M. A. & Perez-Sala, D. Vimentin disruption by  
822 lipoxidation and electrophiles: Role of the cysteine residue and filament dynamics.  
823 *Redox Biol* **23**, 101098, doi:10.1016/j.redox.2019.101098 (2019).
- 824 26 Perez-Sala, D. *et al.* Vimentin filament organization and stress sensing depend on  
825 its single cysteine residue and zinc binding. *Nat Commun* **6**, 7287,  
826 doi:10.1038/ncomms8287 (2015).
- 827 27 Parry, D. A. & Steinert, P. M. Intermediate filaments: molecular architecture,  
828 assembly, dynamics and polymorphism. *Q Rev Biophys* **32**, 99-187,  
829 doi:10.1017/s0033583500003516 (1999).
- 830 28 Strelkov, S. V. *et al.* Conserved segments 1A and 2B of the intermediate filament  
831 dimer: their atomic structures and role in filament assembly. *EMBO J* **21**, 1255-  
832 1266, doi:10.1093/emboj/21.6.1255 (2002).
- 833 29 Qin, Z., Kreplak, L. & Buehler, M. J. Hierarchical structure controls nanomechanical  
834 properties of vimentin intermediate filaments. *PLoS One* **4**, e7294,  
835 doi:10.1371/journal.pone.0007294 (2009).
- 836 30 Sokolova, A. V. *et al.* Monitoring intermediate filament assembly by small-angle x-  
837 ray scattering reveals the molecular architecture of assembly intermediates. *Proc*  
838 *Natl Acad Sci U S A* **103**, 16206-16211, doi:10.1073/pnas.0603629103 (2006).
- 839 31 Kirmse, R. *et al.* A quantitative kinetic model for the in vitro assembly of  
840 intermediate filaments from tetrameric vimentin. *J Biol Chem* **282**, 18563-18572,  
841 doi:10.1074/jbc.M701063200 (2007).
- 842 32 Parry, D. A., Marekov, L. N. & Steinert, P. M. Subfilamentous protofibril structures  
843 in fibrous proteins: cross-linking evidence for protofibrils in intermediate  
844 filaments. *J Biol Chem* **276**, 39253-39258, doi:10.1074/jbc.M104604200 (2001).
- 845 33 Herrmann, H. *et al.* Structure and assembly properties of the intermediate filament  
846 protein vimentin: the role of its head, rod and tail domains. *J Mol Biol* **264**, 933-  
847 953, doi:10.1006/jmbi.1996.0688 (1996).

- 848 34 Herrmann, H., Haner, M., Brettel, M., Ku, N. O. & Aebi, U. Characterization of distinct  
849 early assembly units of different intermediate filament proteins. *J Mol Biol* **286**,  
850 1403-1420, doi:10.1006/jmbi.1999.2528 (1999).
- 851 35 Mucke, N. *et al.* Molecular and biophysical characterization of assembly-starter  
852 units of human vimentin. *J Mol Biol* **340**, 97-114, doi:10.1016/j.jmb.2004.04.039  
853 (2004).
- 854 36 Mucke, N. *et al.* Assembly Kinetics of Vimentin Tetramers to Unit-Length  
855 Filaments: A Stopped-Flow Study. *Biophys J* **114**, 2408-2418,  
856 doi:10.1016/j.bpj.2018.04.032 (2018).
- 857 37 Winheim, S. *et al.* Deconstructing the late phase of vimentin assembly by total  
858 internal reflection fluorescence microscopy (TIRFM). *PLoS One* **6**, e19202,  
859 doi:10.1371/journal.pone.0019202 (2011).
- 860 38 Lopez, C. G., Saldanha, O., Huber, K. & Koster, S. Lateral association and elongation  
861 of vimentin intermediate filament proteins: A time-resolved light-scattering study.  
862 *Proc Natl Acad Sci U S A* **113**, 11152-11157, doi:10.1073/pnas.1606372113  
863 (2016).
- 864 39 Chernyatina, A. A., Nicolet, S., Aebi, U., Herrmann, H. & Strelkov, S. V. Atomic  
865 structure of the vimentin central alpha-helical domain and its implications for  
866 intermediate filament assembly. *Proc Natl Acad Sci U S A* **109**, 13620-13625,  
867 doi:10.1073/pnas.1206836109 (2012).
- 868 40 Qin, Z. & Buehler, M. J. Structure and dynamics of human vimentin intermediate  
869 filament dimer and tetramer in explicit and implicit solvent models. *J Mol Model*  
870 **17**, 37-48, doi:10.1007/s00894-010-0696-6 (2011).
- 871 41 Gae, D. D. *et al.* Completion of the Vimentin Rod Domain Structure Using  
872 Experimental Restraints: A New Tool for Exploring Intermediate Filament  
873 Assembly and Mutations. *Structure* **27**, 1547-1560 e1544,  
874 doi:10.1016/j.str.2019.07.011 (2019).
- 875 42 Turgay, Y. *et al.* The molecular architecture of lamins in somatic cells. *Nature* **543**,  
876 261-264, doi:10.1038/nature21382 (2017).
- 877 43 Goldie, K. N. *et al.* Dissecting the 3-D structure of vimentin intermediate filaments  
878 by cryo-electron tomography. *J Struct Biol* **158**, 378-385,  
879 doi:10.1016/j.jsb.2006.12.007 (2007).
- 880 44 Chen, M. *et al.* Convolutional neural networks for automated annotation of cellular  
881 cryo-electron tomograms. *Nat Methods* **14**, 983-985, doi:10.1038/nmeth.4405  
882 (2017).
- 883 45 Martins, B. *et al.* Unveiling the polarity of actin filaments by cryo-electron  
884 tomography. *Structure*, doi:10.1016/j.str.2020.12.014 (2021).
- 885 46 Bharat, T. A. M. & Scheres, S. H. W. Resolving macromolecular structures from  
886 electron cryo-tomography data using subtomogram averaging in RELION. *Nat*  
887 *Protoc* **11**, 9-20, doi:10.1038/nprot.2016.124 (2016).
- 888 47 Diaz, R., Rice, W. J. & Stokes, D. L. Fourier-Bessel reconstruction of helical  
889 assemblies. *Methods Enzymol* **482**, 131-165, doi:10.1016/S0076-6879(10)82005-  
890 1 (2010).
- 891 48 He, S. & Scheres, S. H. W. Helical reconstruction in RELION. *J Struct Biol* **198**, 163-  
892 176, doi:10.1016/j.jsb.2017.02.003 (2017).
- 893 49 Scheres, S. H. & Chen, S. Prevention of overfitting in cryo-EM structure  
894 determination. *Nat Methods* **9**, 853-854, doi:10.1038/nmeth.2115 (2012).

- 895 50 Olsen, K. & Bohr, J. The generic geometry of helices and their close-packed  
896 structures. *Theor Chem Acc* **125**, 207-215, doi:10.1007/s00214-009-0639-4  
897 (2010).
- 898 51 Parry, D. A., Strelkov, S. V., Burkhard, P., Aebi, U. & Herrmann, H. Towards a  
899 molecular description of intermediate filament structure and assembly. *Exp Cell*  
900 *Res* **313**, 2204-2216, doi:10.1016/j.yexcr.2007.04.009 (2007).
- 901 52 Davies, D. B., Saenger, W., Danyluk, S. S., Federation of European Biochemical  
902 Societies. & North Atlantic Treaty Organization. Scientific Affairs Division.  
903 *Structural molecular biology : methods and applications*. (Plenum Press, 1982).
- 904 53 Kronenberg-Tenga, R. *et al.* A lamin A/C variant causing striated muscle disease  
905 provides insights into filament organization. *Journal of Cell Science* **134**, jcs256156,  
906 doi:10.1242/jcs.256156 (2021).
- 907 54 Kocsis, E., Trus, B. L., Steer, C. J., Bisher, M. E. & Steven, A. C. Image Averaging of  
908 Flexible Fibrous Macromolecules - the Clathrin Triskelion Has an Elastic Proximal  
909 Segment. *Journal of Structural Biology* **107**, 6-14, doi:Doi 10.1016/1047-  
910 8477(91)90025-R (1991).
- 911 55 Steinert, P. M., Marekov, L. N. & Parry, D. A. Diversity of intermediate filament  
912 structure. Evidence that the alignment of coiled-coil molecules in vimentin is  
913 different from that in keratin intermediate filaments. *J Biol Chem* **268**, 24916-  
914 24925 (1993).
- 915 56 Sachse, C. Single-particle based helical reconstruction-how to make the most of  
916 real and Fourier space. *Aims Biophysics* **2**, 219-244,  
917 doi:10.3934/biophy.2015.2.219 (2015).
- 918 57 Hatzfeld, M. & Burba, M. Function of type I and type II keratin head domains: their  
919 role in dimer, tetramer and filament formation. *J Cell Sci* **107 ( Pt 7)**, 1959-1972  
920 (1994).
- 921 58 Mastronarde, D. N. Automated electron microscope tomography using robust  
922 prediction of specimen movements. *Journal of Structural Biology* **152**, 36-51,  
923 doi:10.1016/j.jsb.2005.07.007 (2005).
- 924 59 Li, X. M. *et al.* Electron counting and beam-induced motion correction enable near-  
925 atomic-resolution single-particle cryo-EM. *Nature Methods* **10**, 584-+,  
926 doi:10.1038/nmeth.2472 (2013).
- 927 60 Nickell, S. *et al.* TOM software toolbox: acquisition and analysis for electron  
928 tomography. *J Struct Biol* **149**, 227-234, doi:10.1016/j.jsb.2004.10.006 (2005).
- 929 61 Eibauer, M. *et al.* Unraveling the structure of membrane proteins in situ by transfer  
930 function corrected cryo-electron tomography. *Journal of Structural Biology* **180**,  
931 488-496, doi:10.1016/j.jsb.2012.09.008 (2012).
- 932 62 Pettersen, E. F. *et al.* UCSF chimera - A visualization system for exploratory  
933 research and analysis. *J Comput Chem* **25**, 1605-1612, doi:10.1002/jcc.20084  
934 (2004).
- 935 63 Scheres, S. H. RELION: implementation of a Bayesian approach to cryo-EM  
936 structure determination. *J Struct Biol* **180**, 519-530, doi:10.1016/j.jsb.2012.09.006  
937 (2012).
- 938 64 Schroeder, A. B. *et al.* The ImageJ ecosystem: Open-source software for image  
939 visualization, processing, and analysis. *Protein Sci* **30**, 234-249,  
940 doi:10.1002/pro.3993 (2021).
- 941
